# Supplementary material
Source: PubMed Central journal article supplement (PMC9424328)
Supplement: mmc1.pdf [file mmc1.pdf]

## BAL Transcriptomes Characterize Idiopathic Pulmonary Fibrosis Endotypes With Prognostic Impact

*Laurens J. De Sadeleer, MD, PhD; Stijn E. Verleden, PhD; Jonas C. Schupp, MD, PhD; John E. McDonough, PhD; Tinne Goos, MD; Jonas Yserbyt, MD, PhD; Elena Bargagli, MD, PhD; Paola Rottoli, MD; Naftali Kaminski, MD; Antje Prasse, MD, PhD; and Wim A. Wuyts, MD, PhD*

CHEST2022;161(6):1576-1588

*Online supplements are not copyedited prior to posting and the author(s) take full responsibility for the accuracy of all data.*

© 2022 AMERICAN COLLEGE OF CHEST PHYSICIANS. Reproduction of this article is prohibited without written permission from the American College of Chest Physicians. See online for more details. DOI: 10.1016/j.chest.2021.12.668

## **e-Appendix 1.**

### **Supplementary Methods**

#### *Patient cohort*

We used gene expression and clinical data included in the GSE70867 dataset. The dataset consists of gene expression data retrieved from bronchoalveolar lavage samples of 176 IPF cases and 20 controls. All IPF cases were diagnosed in a multidisciplinary discussion. BAL sampling was performed before initiation of antifibrotic or immunosuppressive treatment (for cases diagnosed before the antifibrotics era). Bronchoalveolar lavage sampling was performed in 3 centres: Freiburg, Siena and Leuven. All control samples were retrieved from Freiburg. Clinical data, included in the online GSE70867 dataset, were age and sex for controls and age, sex, GAP index, death and time to death (or end of follow-up) for IPF cases.

#### *Gene expression data and clustering*

After downloading this publicly available gene expression dataset from the GEO database (GSE70867), batch effects associated with the cohort were diagnosed and were removed using the Combat functionality<sup>48</sup> **e-Figure 1**). Of note, gene expression differences associated with the BAL sampling centre were checked and proved to be negligible.

DDR Tree is a dimension reduction technique specifically designed for gene expression data sets to maximally preserve the intrinsic structure of the data<sup>49</sup>. First, a reverse graph embedding is applied to determine the intrinsic graph structure of the original high dimension dataset. Afterwards, dimension reduction is performed preserving distances of the datapoints in the resulting low dimension space.

Based on the coordinates of the resulting low dimension space (i.e. 3 dimensions), distances between datapoints were calculated using the Euclidean metric and clustering was performed using the complete linkage method. As the goal of the study was to explore the variability of the data and assess whether clustering could be meaningful, the number of clusters chosen as the maximum number of clusters possible, with a minimum of 10 samples per cluster.

For every cluster, differential gene expression versus controls was calculated using linear mixed models (for every gene separately) including gene expression data as the observed variable, age, gender and cluster as fixed effects and the centre in which the sample was performed as random effect. The latter was included to minimize the effect of small differences in processing between the 3 centres and to minimize the effect of imbalances between study

populations. The estimate of the fixed effect 'cluster' was used as fold change and the false discovery rate (FDR)-corrected p-value of this fixed effect as p-value for significance. Overview of the number of differentially expressed genes were visualised with Euler diagrams (using the eulerr R package<sup>50</sup>).

#### *Association with clinical variables and outcome*

Continuous variables were presented as mean  $\pm$  standard deviation. Categorical variables were presented as counts and percentages. Differences between IPF cases and controls were calculated using Student's T tests and fisher exact tests, for continuous and categorical variables, respectively. Differences between clusters regarding to clinical variables were calculated using Anova tests for continuous variables and fisher exact tests for categorical variables. Clustering was associated with clinical outcome using cox proportional hazards models and presented with Kaplan Meier curves.

#### *Functional enrichment*

In order to evaluate the functional annotations of the clusters, gene ontology enrichment was performed using 'generally applicable gene set enrichment analysis' (GAGE<sup>51</sup>). To obtain a broad overview of the functional enrichments of each cluster, we analysed differential expression of gene ontologies between each cluster and all other clusters. Per cluster, a graph was constructed using Cytoscape, with differentially expressed gene ontologies as nodes and the degree of overlapping genes as edge.

In a second phase, to assess direction of differential expression of these pathways, GAGE was used to determine differential expression of gene ontologies for each cluster compared to controls. Expression of gene ontologies associated with the pathways observed in the Cytoscape graphs were visualised using density plots.

Moreover, we performed cellular subtype deconvolution using xCell, which is based on several single cell dataset-based gene signatures, using a spill-over compensation technique to reduce associations of closely related cell types, which was validated using cytometry immunophenotyping and in-silico simulations.

#### *Analysis of transcription factors regulating the expression of survival-associated genes*

In order to evaluate whether distinct gene expression signatures would directly impact on survival, we assessed the expression of 1381 genes, shown to be associated with survival in the initial Prasse study<sup>21</sup>. We evaluated the expression of these genes in each cluster vs all other IPF samples. We evaluated whether these endotype-specific survival-associated gene sets were modulated by distinct motifs and/or transcription factors using iRegulon and the Rcistarget package<sup>52</sup>.

#### *Endotype validation in 3 independent validation cohorts*

To validate the existence of these endotypes, gene expression of the 250 most differentially expressed genes was determined in 3 independent gene expression datasets retrieved from IPF blood samples, i.e. GSE28221<sup>57</sup> (n=75), GSE93606<sup>58</sup> (n=57) and GSE132607<sup>59</sup> (n=74). Gene expression was visualised using heatmaps which allowed the identification of these endotypes by hierarchical clustering. Survival differences between cases with and without an endotype-specific transcriptome in these cohorts were analysed using multivariable cox proportional hazards models, correcting for age and gender. **Supplementary Results**

#### *Analysis of transcription factors regulating the expression of survival-associated genes*

The original Prasse study derived 1582 genes associated with survival (988 associated with worse survival, 594 with better survival). From the original genes associated with worse survival, 100 were upregulated in both IPF5 and IPF6, 601 genes only in IPF5 and 76 genes only in IPF6. From the original genes associated with better survival, 93 genes were downregulated in both IPF5 and IPF6, 181 only in IPF5 and 90 in IPF6. The analysis of transcriptional regulation in IPF5 is elaborated in the main text. We evaluated the regulation of these sets of cluster-specific survival-associated genes. In IPF6, upregulated genes associated with worse survival showed a very different set of enriched transcription factors, including SNAI1-3, sirtuin 6 (SiRT6) and T-box transcription factor 2 and 3 (TBX2 & TBX3), whereof the latter showed very high expression in IPF6 but not in IPF5. Downregulated genes associated with better survival were regulated by another set of transcription factors including PKNOX1 and SETDB1 and both downregulated in IPF6 but not in IPF5 (e-Figure 4).

#### *Validation of endotype existence and its impact on survival*

We also validated the existence of the IPF6 endotype in the 3 independent datasets mentioned in the main text. Based on the gene expression of the 250 top differentially expressed genes

# CHEST<sup>®</sup> Online Supplement

for IPF5 and IPF6 (compared to all other IPF cases), 51 (24.8%) and 21 (10.2%) cases in the validation cohort showed an IPF5 and IPF6 transcriptome signature, respectively (**e-Figure 5A**). IPF6 endotype did not confer worse outcome (HR 0.44,  $p=0.11$ ), shown in **e-Figure 5B**.

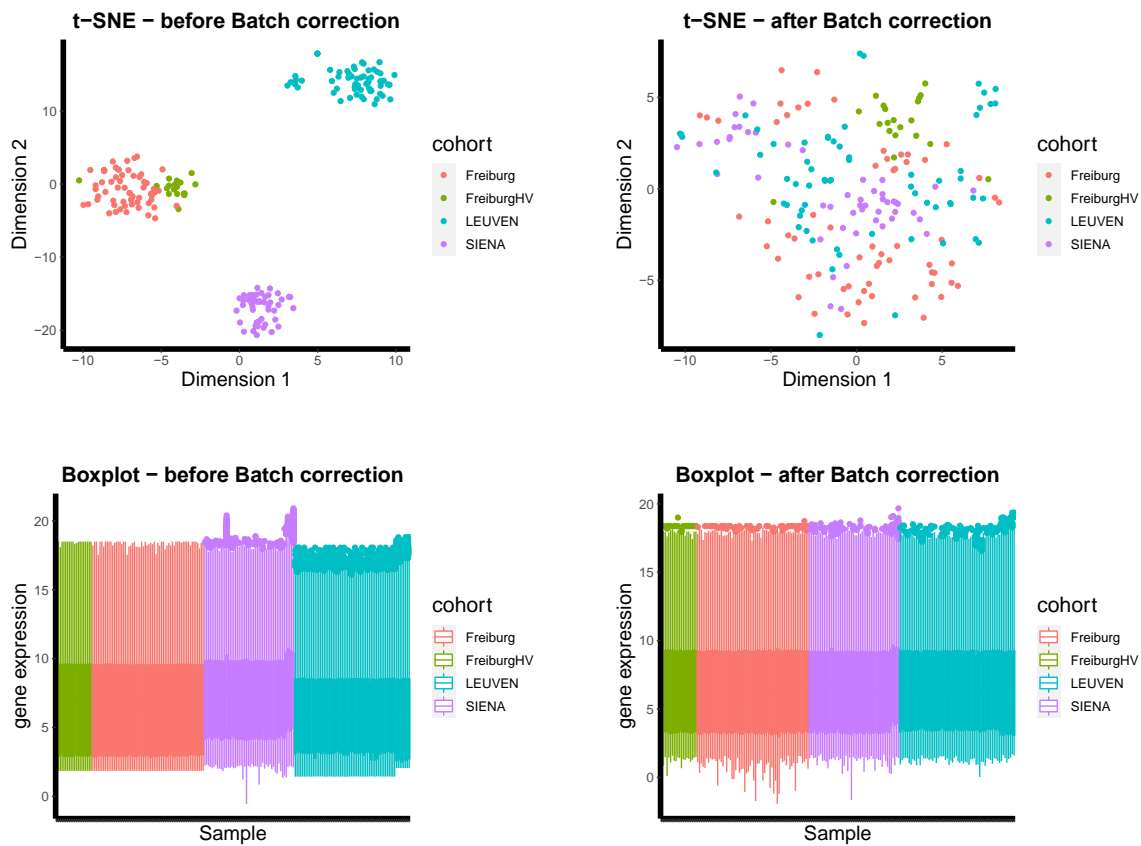

**e-Figure 1. Batch effect removal using ComBat**

Left: t-SNE plot and gene expression boxplot before batch effect removal. Right: t-SNE plot and gene expression boxplot after Batch effect removal. The Freiburg cohort was split into controls (healthy volunteers, “FreiburgHV”) and IPF cases (“Freiburg”).

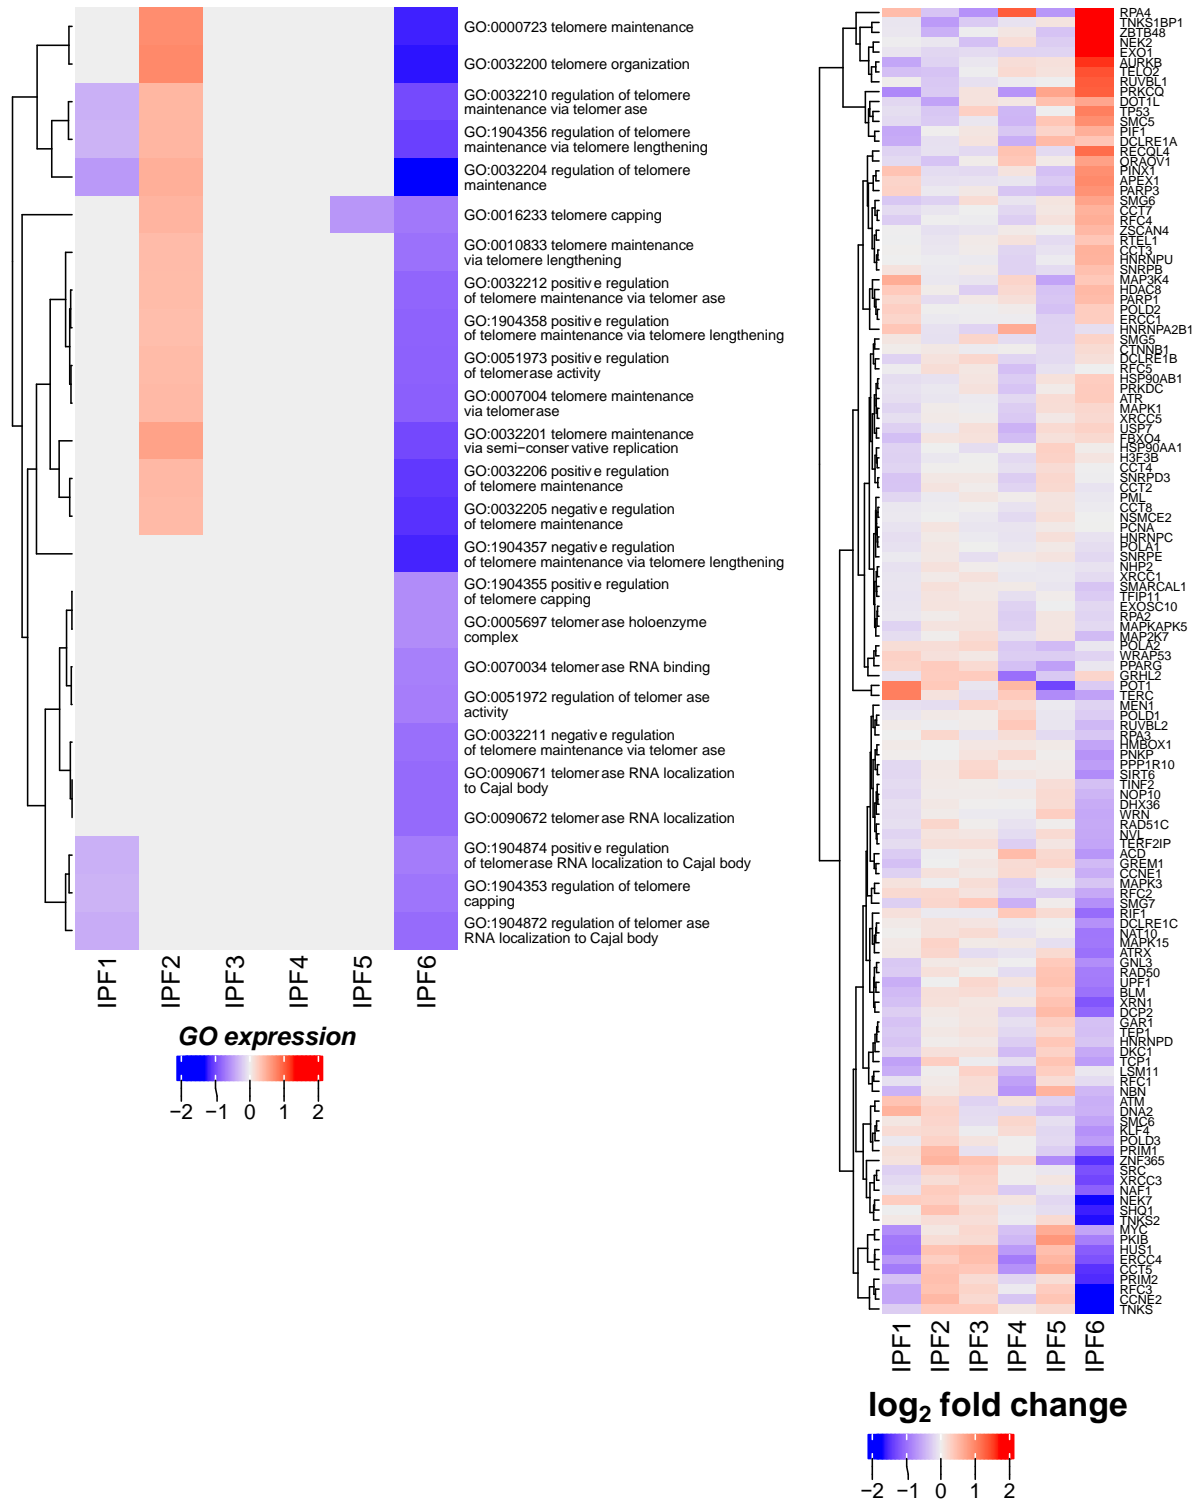

**e-Figure 2: differential expression of Gene ontologies and genes related to telomere functions**

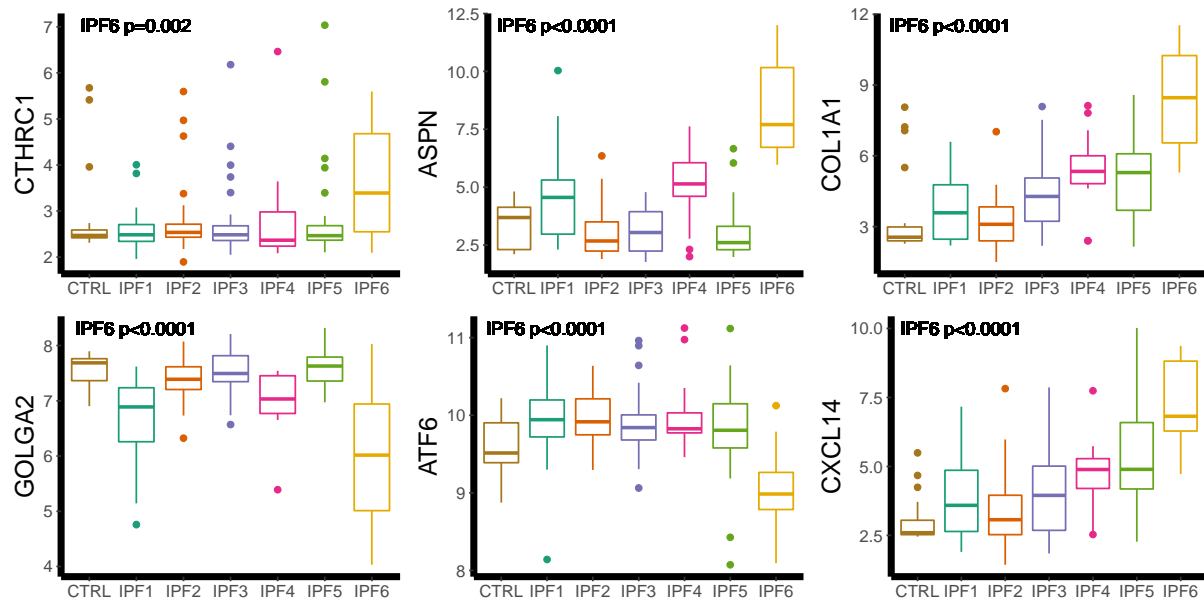

**e-Figure 3 Gene expression of marker genes associated with enriched functions of IPF6.**

A. Gene expression of several marker genes for myofibroblast functions (CTHRC1, ASPN and COL1A1) and cell homeostasis function (Golgi: GOLGA2, unfolded protein response: ATF6, developmental pathways (Hedgehog): CXCL14). P-values are determined vs all other IPF samples. B. cell subtype deconvolution using xCell based on bulk transcriptome datasets.



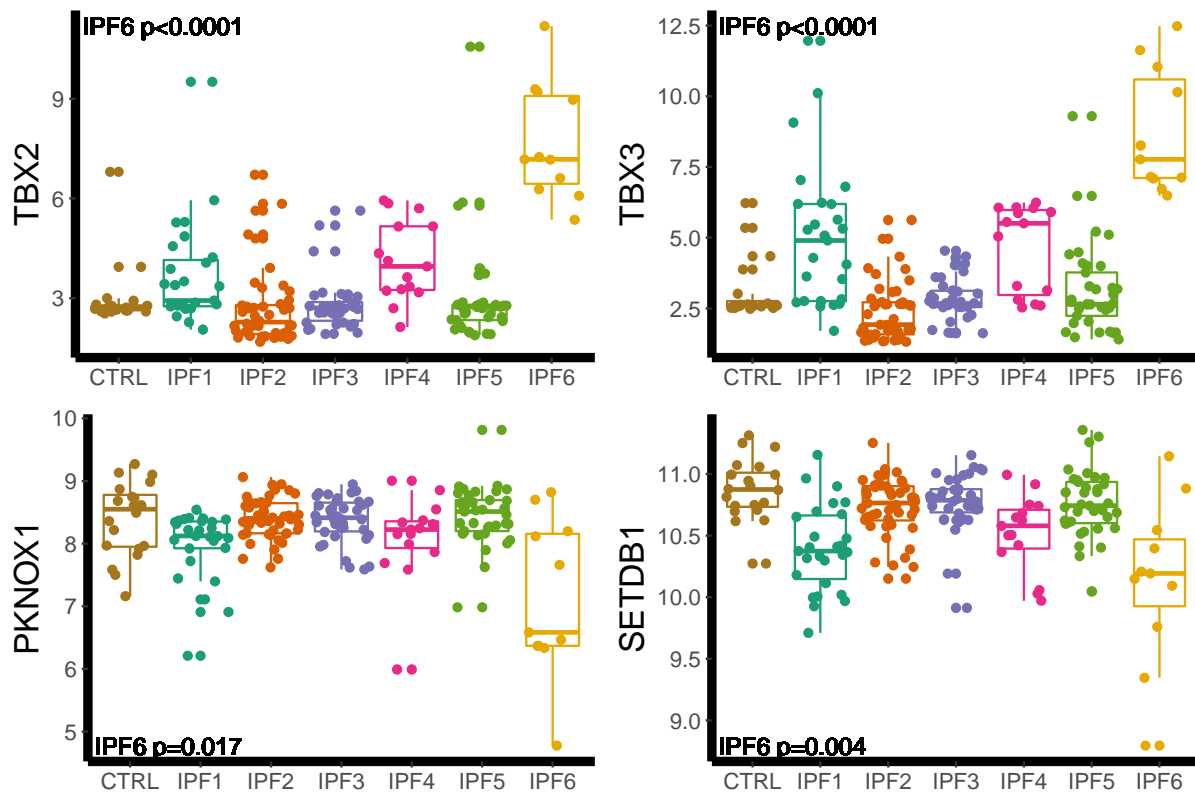

**e-Figure 4. Gene expression of transcription factors regulating endotype-specific survival genes in IPF6**

P-values are determined vs controls. Y-axis represents normalised expression.

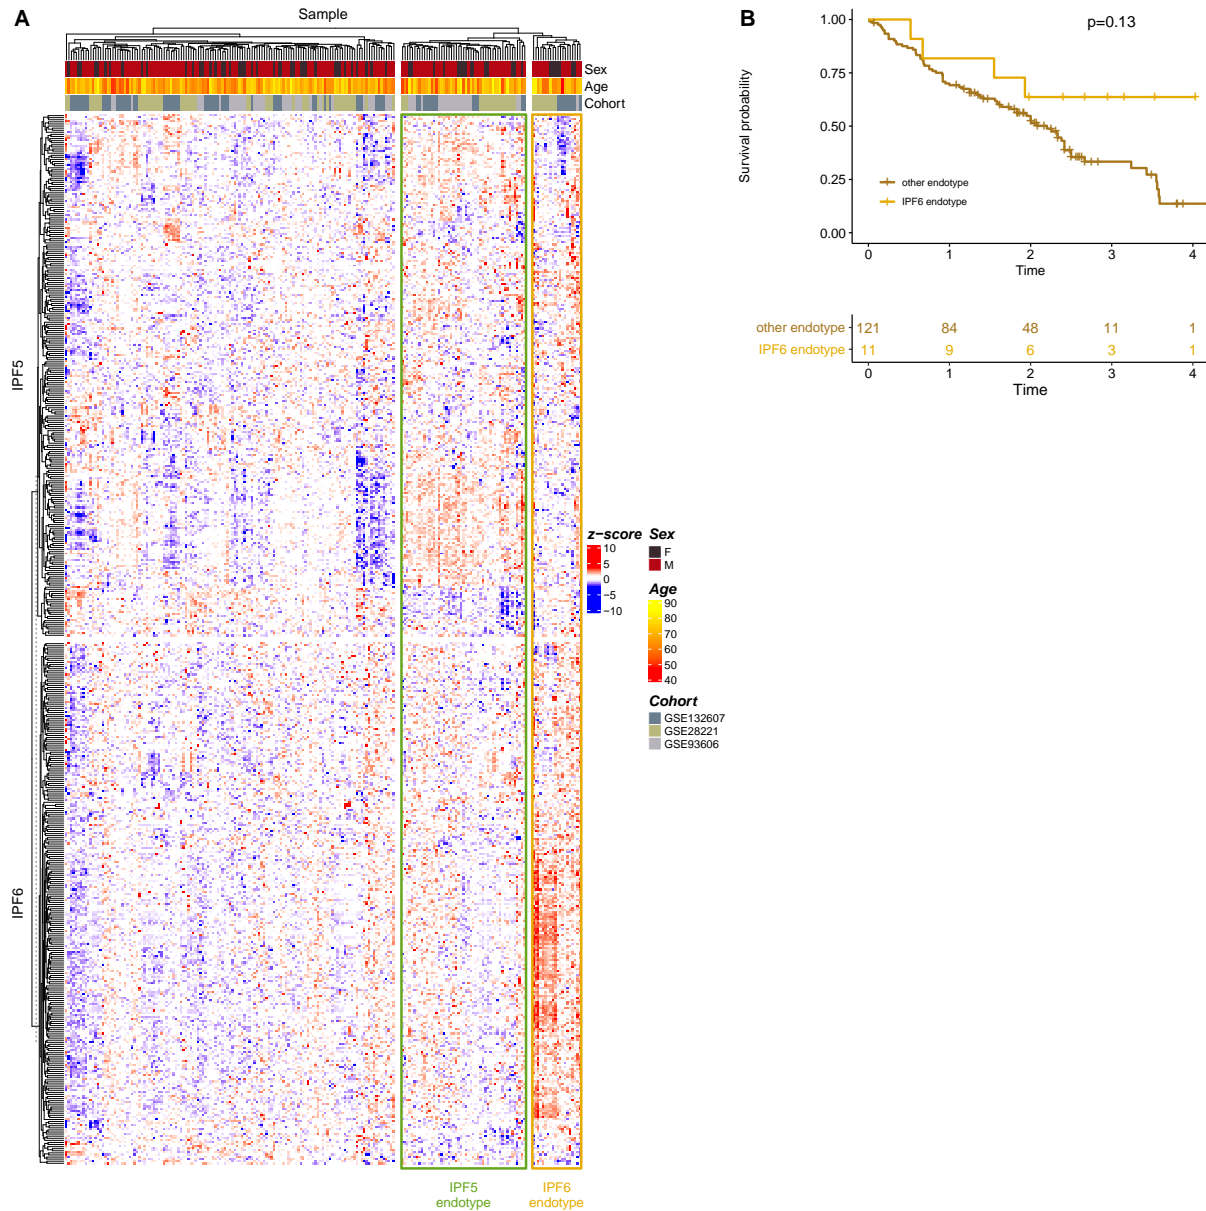

**e-Figure 5. IPF endotype validation in separate blood gene expression datasets**

(A) Heatmap showing gene expression of most differentially expressed genes for IPF5 and IPF6 in 3 independent gene expression dataset based on blood RNA of IPF cases. (B) Cases with a IPF5-like gene expression in the validation cohorts show worse survival compared to other cases. (C) Survival of cases with a IPF6-like gene expression in the validation cohorts did not show different survival compared to other cases.

**e-Table 1A. IPF5 genelist**

| <b>gene</b> | <b>log2FC_vsotherIPF</b> | <b>p_vsotherIPF</b> | <b>log2FC_vsCTRL</b> | <b>p_vsCTRL</b> |
|-------------|--------------------------|---------------------|----------------------|-----------------|
| PRSS23      | 2.271429084              | 2.54054E-16         | 1.883992497          | 0.000213        |
| TLR2        | 1.155916842              | 4.8831E-15          | 1.623453471          | 1.82E-08        |
| NKX2-1      | 1.846051725              | 5.3956E-15          | 2.539199876          | 1.98E-06        |
| RASSF2      | 1.521615122              | 7.5518E-15          | 1.894159655          | 1.95E-06        |
| AMPD3       | 2.038471146              | 2.73532E-14         | 2.003699501          | 2.47E-07        |
| CYR61       | 2.300547331              | 4.41077E-14         | 3.343624086          | 3.11E-08        |
| PTPRN2      | 1.996786999              | 4.41077E-14         | 1.258251655          | 0.005398        |
| SGPP2       | 1.66893515               | 8.17121E-14         | 1.916745585          | 4.51E-05        |
| PXN         | 1.837181491              | 1.0439E-13          | 1.875300932          | 0.000254        |
| DAZAP2      | 0.518336715              | 1.06123E-13         | 0.410277126          | 0.001423        |
| SLCO4A1     | 1.80384868               | 1.0742E-13          | 2.064278597          | 1.16E-05        |
| EFR3B       | 1.668586622              | 1.33713E-13         | 2.079044309          | 3.58E-08        |
| ACPP        | 1.469399285              | 3.6045E-13          | 2.265997547          | 1.54E-09        |
| CEACAM6     | 2.732327298              | 3.9498E-13          | 3.754655765          | 5.39E-09        |
| MAL2        | 2.408853634              | 5.15643E-13         | 2.491442013          | 9.52E-05        |
| NFKBIA      | 0.84293266               | 6.2131E-13          | 0.839472328          | 0.000109        |
| TMEM154     | 1.856926778              | 6.24301E-13         | 1.942567035          | 6.23E-06        |
| CHST15      | 2.471263033              | 7.80328E-13         | 3.159375922          | 7.43E-07        |
| C9ORF152    | 1.625392704              | 1.40449E-12         | 1.877585985          | 0.000467        |
| CTTN        | 1.966336387              | 1.4282E-12          | 1.347049194          | 0.000947        |
| DENND3      | 0.81187425               | 1.66564E-12         | 0.933153077          | 3.99E-05        |
| TMEM30B     | 1.697215835              | 1.66564E-12         | 1.421871902          | 0.00873         |
| XYLT1       | 1.558771981              | 1.66564E-12         | 1.704167541          | 2.02E-06        |
| CXCR4       | 1.335987567              | 1.8233E-12          | 1.655557832          | 0.0006          |
| PRKCB       | 1.454453278              | 1.97703E-12         | 1.709409569          | 6.94E-06        |
| PLIN5       | 1.899367018              | 2.00137E-12         | 2.026131426          | 0.000146        |
| CHST2       | 1.854475798              | 2.09323E-12         | 2.257252353          | 3.78E-07        |
| MARCKS      | 1.48816818               | 2.4839E-12          | 2.139775597          | 9.59E-07        |
| TMEM71      | 1.25000433               | 3.31251E-12         | 1.721695108          | 5.54E-05        |
| LCP2        | 0.684416833              | 3.41339E-12         | 0.619686968          | 0.000343        |
| SERPINB9    | 1.912506576              | 3.75566E-12         | 1.794086263          | 1.56E-05        |
| MERTK       | 2.214589329              | 4.238E-12           | 3.638899666          | 8.64E-11        |
| S1PR3       | 1.737280325              | 4.27957E-12         | 2.846604279          | 4.2E-08         |
| KCNK1       | 1.588862674              | 4.87806E-12         | 1.574343294          | 0.000446        |
| FYB1        | 0.973084451              | 5.76402E-12         | 0.456345574          | 0.15854         |
| LAMA3       | 1.835820667              | 5.76402E-12         | 2.699229155          | 3.65E-06        |
| RFLNB       | 1.823972413              | 7.81132E-12         | 1.471373102          | 0.003023        |
| DGKD        | 0.964626333              | 7.98264E-12         | 0.886936931          | 6.25E-05        |



# CHEST<sup>®</sup> Online Supplement

|          |              |             |              |          |
|----------|--------------|-------------|--------------|----------|
| MXD1     | 1.14440994   | 7.98264E-12 | 1.523626649  | 5.51E-06 |
| SH3KBP1  | 0.831649636  | 7.98264E-12 | 0.517476754  | 0.027564 |
| SLC7A11  | 1.863724738  | 7.98264E-12 | 1.808725863  | 0.000233 |
| SLC25A37 | 1.607242457  | 8.75068E-12 | 1.720848053  | 0.000138 |
| ARHGAP45 | 1.088261464  | 8.8743E-12  | 0.673721729  | 0.086144 |
| KCNJ2    | 1.261541855  | 8.99159E-12 | 1.750581862  | 1.05E-09 |
| LILRB2   | 0.82231994   | 8.99159E-12 | 0.69206316   | 0.002317 |
| LBR      | 0.732630998  | 9.68019E-12 | 0.851304885  | 0.000121 |
| FNBP1L   | 1.685160006  | 1.03508E-11 | 1.508186343  | 0.001012 |
| HIF1A    | 1.2609953    | 1.03508E-11 | 1.477201571  | 3.25E-06 |
| FAM49B   | 0.614705231  | 1.23368E-11 | 0.704651028  | 1.72E-05 |
| FAM198B  | 1.506136145  | 1.27993E-11 | 2.452740215  | 3.58E-08 |
| ST8SIA4  | 1.722895748  | 1.28026E-11 | 1.88039842   | 0.000103 |
| ADAM8    | 1.511827175  | 1.48712E-11 | 1.81737684   | 8.18E-05 |
| AP1S2    | 0.856439364  | 1.48712E-11 | 1.032889395  | 0.000146 |
| MET      | 2.102047013  | 1.48712E-11 | 2.953468883  | 8.94E-07 |
| LIMCH1   | 1.541408124  | 1.95112E-11 | 1.158315329  | 0.016421 |
| PERP     | 1.780253567  | 1.95112E-11 | 0.917176526  | 0.028763 |
| PRR5L    | 1.613797854  | 2.07984E-11 | 1.452155743  | 2.36E-05 |
| SH2D3A   | 1.284254475  | 2.09423E-11 | 0.364795174  | 0.305908 |
| WWC1     | 1.452721794  | 2.09423E-11 | 1.438814256  | 0.000915 |
| CLDN18   | 2.125978725  | 2.11152E-11 | 2.989381726  | 7.72E-07 |
| P2RY2    | 1.382961851  | 2.16001E-11 | 2.467974363  | 7.29E-10 |
| PLA2G7   | 1.746795933  | 2.26833E-11 | 3.333787351  | 8.39E-11 |
| CCL8     | 2.393795084  | 2.27709E-11 | 1.996223378  | 0.003187 |
| SAT1     | 0.599388556  | 2.30418E-11 | 0.491248049  | 0.012365 |
| PRDM1    | 1.579019043  | 2.6974E-11  | 0.976958103  | 0.027574 |
| NINJ1    | 1.038131423  | 3.24361E-11 | 0.971058733  | 0.004286 |
| ADGRF5   | 1.813217462  | 4.06179E-11 | 2.115418001  | 0.013951 |
| MUC21    | 1.652961341  | 4.073E-11   | 2.546769586  | 1.46E-06 |
| PRDM8    | 1.806704721  | 4.19149E-11 | 1.520466504  | 0.001058 |
| SUSD6    | 0.55160448   | 4.39181E-11 | 0.32929428   | 0.016461 |
| EPCAM    | 2.151017906  | 4.76147E-11 | 2.474096983  | 9.88E-05 |
| KRT23    | 2.093993166  | 6.02625E-11 | 2.2527745    | 0.000113 |
| LHFPL6   | 1.463012808  | 6.1226E-11  | 1.889494784  | 3.22E-07 |
| MYLIP    | 1.017690976  | 6.33858E-11 | 0.663065936  | 0.012398 |
| BASP1    | 1.262084476  | 6.55401E-11 | 1.837915524  | 9.53E-07 |
| GALNT3   | 1.619358599  | 6.81897E-11 | 1.362236222  | 0.002317 |
| CNKSR1   | 1.468210695  | 6.96875E-11 | 1.146393233  | 0.005558 |
| GPD1     | -1.416840343 | 6.96875E-11 | -1.448700736 | 0.003966 |



# CHEST<sup>®</sup> Online Supplement

|         |              |             |              |          |
|---------|--------------|-------------|--------------|----------|
| RIPOR2  | 1.571663228  | 7.11704E-11 | 1.612779021  | 0.000148 |
| ASPRV1  | 1.78589048   | 7.42516E-11 | 1.366278283  | 0.002227 |
| CHD3    | 1.193374425  | 7.42516E-11 | 0.502263324  | 0.101605 |
| SLC36A1 | 0.957262139  | 8.40401E-11 | 1.608494305  | 2.33E-07 |
| SELL    | 1.829399139  | 8.60418E-11 | 1.63250636   | 0.000628 |
| TESC    | 1.453269856  | 8.72861E-11 | 1.6412014    | 0.000636 |
| KITLG   | 1.417697885  | 9.7026E-11  | 1.453707465  | 0.001048 |
| SOD2    | 1.015909911  | 9.89841E-11 | 1.025575415  | 0.003149 |
| ATL1    | -1.003686679 | 1.0303E-10  | -1.10725743  | 0.003085 |
| CSF3R   | 1.173048884  | 1.12336E-10 | 1.220101166  | 0.002994 |
| FHL1    | -1.070822525 | 1.12336E-10 | -0.998373109 | 7.51E-05 |
| ADM     | 1.797564852  | 1.29593E-10 | 2.889102229  | 6.8E-07  |
| ST6GAL1 | 1.120435185  | 1.45343E-10 | 0.74808936   | 0.035606 |
| GLCCI1  | 1.449230382  | 1.65585E-10 | 0.66984659   | 0.065217 |
| MTSS1   | 1.674176417  | 1.71018E-10 | 2.226410255  | 2.95E-06 |
| LAPTM4B | 1.446524425  | 1.86165E-10 | 1.943209795  | 5.56E-07 |
| RAB25   | 1.499057683  | 1.96961E-10 | 1.811549384  | 0.000189 |
| RAB37   | 1.422664904  | 2.31557E-10 | 0.902203975  | 0.04165  |
| OXCT1   | 1.45388324   | 2.7814E-10  | 1.30395955   | 4.7E-05  |
| ENO2    | 1.466974048  | 2.84122E-10 | 0.786522506  | 0.086215 |
| TACC2   | 1.418742006  | 2.84277E-10 | 0.895260839  | 0.127172 |
| LRRC70  | 1.368044269  | 2.88132E-10 | 1.465812747  | 0.00039  |
| MMP24   | 1.472979085  | 2.94062E-10 | 1.699181103  | 0.000325 |
| STEAP4  | 1.94631803   | 3.09317E-10 | 3.217596008  | 5.28E-08 |
| SLC44A1 | 1.049554519  | 3.21399E-10 | 1.736750362  | 3.58E-08 |
| HAMP    | 1.80989683   | 3.2211E-10  | 2.341730188  | 2.37E-05 |
| TJP2    | -0.895330278 | 3.79602E-10 | -0.497449591 | 0.038276 |
| CD93    | 1.477776389  | 3.81032E-10 | 1.783916265  | 7.23E-07 |
| WDR26   | 0.540152073  | 3.81032E-10 | 0.460821561  | 0.001188 |
| ABLIM1  | 1.66394437   | 3.94484E-10 | 0.666237267  | 0.154115 |
| ANXA3   | 1.492747869  | 4.48753E-10 | 1.517153312  | 0.000179 |
| CMTM8   | 1.348061251  | 4.48753E-10 | 0.922944637  | 0.019703 |
| RHOH    | 1.142438631  | 4.48753E-10 | 0.856932895  | 0.017701 |
| TAGAP   | 0.826487642  | 4.70589E-10 | 0.562677804  | 0.055858 |
| ADGRG1  | 1.643318166  | 5.20321E-10 | 1.915757978  | 0.000168 |
| VGF     | 1.066213912  | 5.20321E-10 | 1.238160035  | 0.000122 |
| RNF145  | 0.908183065  | 5.96064E-10 | 0.748807605  | 0.001222 |
| PLIN4   | 1.35387597   | 6.27684E-10 | 1.487501431  | 0.000371 |
| F2RL1   | 1.734856732  | 6.49815E-10 | 2.816383208  | 1.39E-06 |
| PPIF    | 0.686553806  | 6.62652E-10 | 0.778393154  | 0.001241 |



# CHEST<sup>®</sup> Online Supplement

|          |              |             |              |          |
|----------|--------------|-------------|--------------|----------|
| TMC5     | 1.830701774  | 6.67798E-10 | 1.132752578  | 0.039704 |
| RASA3    | 0.744756357  | 6.7138E-10  | 0.420478346  | 0.099333 |
| CCL3     | 1.554183286  | 6.8199E-10  | 2.025145799  | 2.43E-05 |
| PHLDA3   | -0.963403193 | 7.00868E-10 | -1.185297669 | 0.002931 |
| FOXQ1    | 1.636719603  | 7.27756E-10 | 1.969890203  | 0.007621 |
| SGK1     | 0.835227093  | 7.40696E-10 | 1.111819339  | 3.74E-05 |
| HOMER3   | 0.907547723  | 7.82516E-10 | 1.843753485  | 1.61E-10 |
| GRAMD4   | 0.808653378  | 8.24664E-10 | 0.702262771  | 0.000779 |
| SLC2A1   | 1.340894933  | 8.3711E-10  | 1.202814848  | 0.000379 |
| INPP5A   | 1.152955076  | 8.79614E-10 | 1.53119826   | 7.23E-07 |
| PAK1     | 0.533632553  | 8.97418E-10 | 0.772079875  | 6.27E-06 |
| GALM     | 0.839881901  | 9.41877E-10 | 0.663550362  | 0.009427 |
| GPR132   | 1.264597066  | 9.41877E-10 | 1.378564035  | 0.000405 |
| SULF2    | 1.302397386  | 9.41877E-10 | 1.88577321   | 6.86E-05 |
| OLIG1    | 2.023952872  | 9.54304E-10 | 3.398422686  | 1.64E-08 |
| GYPC     | -0.640594797 | 9.91473E-10 | -0.751725092 | 0.001295 |
| CMTM4    | 1.31132884   | 1.07291E-09 | 1.149212235  | 0.004467 |
| SPNS2    | 1.105807511  | 1.07291E-09 | 1.409993996  | 2.52E-06 |
| AREG     | 1.850066935  | 1.09099E-09 | 2.510387218  | 1.15E-07 |
| RGL1     | 1.573742001  | 1.13571E-09 | 2.889567334  | 7.29E-10 |
| CAT      | -0.663609613 | 1.17197E-09 | -0.842391483 | 0.000118 |
| PLD6     | 1.314805653  | 1.22542E-09 | 1.095685866  | 1.21E-05 |
| PTPN7    | 1.394655568  | 1.22542E-09 | 1.226131504  | 0.002724 |
| IGFBP7   | 0.932490592  | 1.23265E-09 | 1.468546837  | 1.38E-05 |
| CGN      | 1.822540151  | 1.26275E-09 | 1.017261764  | 0.087178 |
| PTPRF    | 2.08676091   | 1.27186E-09 | 1.203553903  | 0.024678 |
| EIF4E3   | 1.39922693   | 1.31587E-09 | 1.261330607  | 0.000521 |
| FOLR3    | -1.738122195 | 1.46951E-09 | -2.307705336 | 9.38E-06 |
| CD24     | 1.565466873  | 1.48572E-09 | 1.946998342  | 0.000196 |
| MYO1D    | 1.600799223  | 1.49657E-09 | 1.640471869  | 6.07E-05 |
| SELENBP1 | 1.981952054  | 1.50625E-09 | 1.236819347  | 0.037943 |
| SCGB3A2  | 1.288779438  | 1.55791E-09 | 2.043734832  | 4.8E-05  |
| ADGRF1   | 1.75908427   | 1.59454E-09 | 1.528659868  | 0.025742 |
| ALDH1A3  | 1.476978984  | 1.77009E-09 | 1.388305437  | 0.003526 |
| HIP1R    | 1.610897884  | 1.77009E-09 | 0.79278674   | 0.07229  |
| ARHGAP9  | 0.647210931  | 1.77506E-09 | 0.277591254  | 0.358676 |
| VMO1     | -1.147660821 | 1.84065E-09 | -1.679597716 | 0.00031  |
| JAK3     | 1.447149997  | 1.87603E-09 | 0.703589005  | 0.222141 |
| MRVI1    | 2.018674024  | 1.8763E-09  | 3.032214235  | 7.69E-08 |
| PLEKHO1  | 0.740743008  | 1.8763E-09  | 0.563048954  | 0.023205 |



# CHEST<sup>®</sup> Online Supplement

|            |              |             |              |          |
|------------|--------------|-------------|--------------|----------|
| SLAMF7     | 1.681621484  | 2.14062E-09 | 0.968379238  | 0.08161  |
| SLC24A3    | 1.475359097  | 2.19302E-09 | 2.153583683  | 2.49E-06 |
| ID1        | 1.696582451  | 2.20026E-09 | 2.042547328  | 8.4E-05  |
| LINC00626  | -0.990414244 | 2.25383E-09 | -0.942187546 | 0.002527 |
| MAK        | 1.261506345  | 2.31815E-09 | 0.790318661  | 0.030173 |
| TCF7L2     | -1.167735181 | 2.38645E-09 | -0.837275629 | 0.008824 |
| ARF6       | 0.739708147  | 2.73883E-09 | 0.495214639  | 0.008267 |
| RUNX3      | 0.879330669  | 2.73883E-09 | 0.359705156  | 0.345106 |
| SLC26A11   | 1.066874056  | 2.73883E-09 | 0.745489157  | 0.011636 |
| CNEP1R1    | 0.54548148   | 2.75233E-09 | 0.359988519  | 0.015105 |
| HNRNPD     | 0.391214176  | 2.81191E-09 | 0.218278209  | 0.10258  |
| TC2N       | 1.488752321  | 2.81191E-09 | 0.059924487  | 0.943974 |
| NUP62      | 0.431681282  | 2.97343E-09 | 0.327400172  | 0.011228 |
| SLC39A14   | 1.225113818  | 3.01183E-09 | 0.939217517  | 0.000524 |
| ST6GALNAC1 | 1.608747122  | 3.01183E-09 | 0.557597179  | 0.406744 |
| SCEL       | 1.459252798  | 3.06567E-09 | 2.11120269   | 0.000154 |
| ADGRA3     | 1.202116142  | 3.13737E-09 | 1.193282381  | 0.009636 |
| PROK2      | 2.454773188  | 3.13737E-09 | 1.944499283  | 0.002471 |
| SLC1A1     | 0.925490093  | 3.13737E-09 | 0.728627024  | 0.089936 |
| C9ORF47    | 1.407443641  | 3.28992E-09 | 1.804745706  | 6.97E-05 |
| ARL4C      | 1.343102687  | 3.37131E-09 | 0.846398798  | 0.056727 |
| HTRA1      | 1.811598592  | 3.50095E-09 | 3.581534     | 4.66E-09 |
| MIAT       | 2.085735242  | 3.63111E-09 | 0.225173072  | 0.796965 |
| TP53BP2    | 0.902266993  | 3.63223E-09 | 0.651497347  | 3.74E-05 |
| TMEM121B   | 1.307639581  | 3.7418E-09  | 1.878417143  | 2.46E-07 |
| SMAD3      | 1.826017716  | 3.74518E-09 | 0.829062207  | 0.155447 |
| FAHD2CP    | -0.511709986 | 3.93052E-09 | -0.573397596 | 0.000253 |
| CDH1       | 2.002527523  | 3.99474E-09 | 1.006920904  | 0.148651 |
| YPEL4      | -1.352923978 | 4.0545E-09  | -0.387828439 | 0.357309 |
| GHRL       | 1.247972917  | 4.07722E-09 | 1.373406407  | 0.000112 |
| HS3ST3B1   | 1.743374541  | 4.07722E-09 | 1.639810214  | 0.000338 |
| SLC7A5     | 1.636543586  | 4.07722E-09 | 1.287979539  | 0.000158 |
| TRAF5      | 1.128728285  | 4.07722E-09 | 0.81896696   | 0.023674 |
| RHOBTB3    | 1.235539562  | 4.1618E-09  | 1.424659255  | 5.04E-05 |
| BMP6       | 1.384787229  | 4.17815E-09 | 1.965672359  | 1.79E-05 |
| C10RF116   | 1.468237596  | 4.17815E-09 | 2.116133478  | 8.94E-06 |
| SMIM3      | 1.028545744  | 4.17815E-09 | 1.60441287   | 1.49E-06 |
| OCIAD2     | 0.901599075  | 4.187E-09   | 0.408549252  | 0.22548  |
| AJUBA      | 0.963934903  | 4.37367E-09 | 1.112802182  | 0.003767 |
| DSP        | 1.726794209  | 4.48741E-09 | 0.501363703  | 0.437632 |





# CHEST<sup>®</sup> Online Supplement

|            |              |             |              |          |
|------------|--------------|-------------|--------------|----------|
| EEPD1      | 1.121565071  | 4.48741E-09 | 1.666707058  | 0.005946 |
| RGS2       | 1.330947646  | 4.48741E-09 | 2.121155679  | 6E-06    |
| TNFRSF10C  | 1.238031868  | 4.48741E-09 | 1.339310317  | 0.002735 |
| NPL        | 0.924863059  | 4.6007E-09  | 0.97651345   | 0.000869 |
| PPID       | 0.614552322  | 4.6007E-09  | 0.233782007  | 0.0795   |
| EFNB1      | -0.659293485 | 5.24191E-09 | -0.5385239   | 0.049129 |
| KDM7A      | 1.244666326  | 5.28923E-09 | 0.65654297   | 0.032426 |
| KLHL5      | 1.185357571  | 5.3237E-09  | 0.988585069  | 0.000208 |
| VSIG1      | 1.217829266  | 5.3237E-09  | 1.508830623  | 0.00079  |
| CARD19     | 0.558119494  | 5.89428E-09 | 0.87736508   | 6.44E-06 |
| IRAK2      | 1.683428828  | 5.90781E-09 | 1.114661865  | 0.003906 |
| RELB       | 0.880568071  | 5.90781E-09 | 0.713472871  | 0.028121 |
| RGL4       | 1.896738972  | 5.90781E-09 | 2.009745785  | 0.000642 |
| PKP3       | 1.783374323  | 5.92751E-09 | 1.898272559  | 0.000534 |
| S100A13    | -0.826953976 | 5.92751E-09 | -0.850444207 | 0.015952 |
| TBC1D14    | 0.514982696  | 6.05794E-09 | 0.382805207  | 0.028802 |
| MYCNOS     | -1.325967037 | 6.19036E-09 | -0.503060479 | 0.263478 |
| TPST1      | 2.253045833  | 6.19036E-09 | 4.252373188  | 1.61E-10 |
| TSPAN5     | 1.593534393  | 6.19036E-09 | 0.95833327   | 0.049991 |
| PDE4B      | 0.884904316  | 6.23031E-09 | 0.780726959  | 0.011636 |
| CLIC6      | 1.699115804  | 6.24602E-09 | 0.973669405  | 0.122779 |
| KANK1      | 1.675670382  | 7.16851E-09 | 2.640247644  | 3.11E-07 |
| CDK6       | 1.379314337  | 7.21216E-09 | 0.937531835  | 0.012406 |
| IFNAR2     | 0.701310213  | 7.21216E-09 | 0.598723178  | 0.030802 |
| OSBPL7     | 1.063142017  | 7.21216E-09 | 0.87166341   | 0.002999 |
| SLC25A23   | 1.479129138  | 7.34212E-09 | 1.474258089  | 0.000429 |
| SNCA       | 0.997976943  | 7.85133E-09 | 1.721863703  | 4.14E-06 |
| GGA2       | -0.592822588 | 7.86929E-09 | -0.79025029  | 0.000681 |
| FAM20A     | 1.356993661  | 8.17328E-09 | 1.916502493  | 1.35E-06 |
| MPP6       | 1.020584995  | 8.17328E-09 | 1.402884234  | 2.9E-05  |
| TPP1       | -1.076793492 | 8.39153E-09 | -0.510470302 | 0.25061  |
| CLDN4      | 2.018327824  | 8.57219E-09 | 1.839337003  | 0.005238 |
| FCAR       | 1.61372039   | 8.57219E-09 | 1.656691109  | 0.001766 |
| MPP1       | 0.487260744  | 8.68227E-09 | 0.511496733  | 0.002262 |
| DPEP3      | -1.347722177 | 8.70925E-09 | -0.585248046 | 0.152571 |
| REC8       | 0.936091467  | 8.71688E-09 | 0.168078448  | 0.548715 |
| TSHZ3      | 1.364051931  | 8.77668E-09 | 1.43300123   | 4.09E-06 |
| AL121899.1 | 1.937475269  | 8.8433E-09  | 1.373386471  | 0.017307 |
| CXCL17     | 2.044302655  | 8.90304E-09 | 1.246143153  | 0.055858 |
| SGTB       | 0.940957882  | 9.13199E-09 | 0.99404643   | 0.00178  |



# CHEST<sup>®</sup> Online Supplement

|            |              |             |             |          |
|------------|--------------|-------------|-------------|----------|
| SEC14L1    | 0.698328962  | 9.14938E-09 | 0.903206475 | 0.000123 |
| AL365203.2 | 1.464813033  | 9.33136E-09 | 0.409116487 | 0.352138 |
| TRERF1     | 1.132415591  | 9.33136E-09 | 1.173065918 | 0.003784 |
| DLG3       | 1.56392322   | 9.63995E-09 | 0.409637354 | 0.388872 |
| SOD3       | 1.917395139  | 9.65966E-09 | 3.788794057 | 1.09E-09 |
| ATP13A3    | 0.791616725  | 9.77475E-09 | 0.94096314  | 0.00079  |
| S100A12    | 2.304662814  | 1.05967E-08 | 4.309204668 | 3.58E-08 |
| COG3       | 0.860713944  | 1.08742E-08 | 0.372659073 | 0.036729 |
| CTSL       | 0.785864961  | 1.13496E-08 | 0.821113543 | 0.015446 |
| ADAMDEC1   | 1.368128368  | 1.15019E-08 | 1.047560202 | 0.08341  |
| AP002008.2 | -1.022292902 | 1.17494E-08 | -0.26942819 | 0.503312 |
| KIAA1551   | 0.7876675    | 1.18377E-08 | 0.395721879 | 0.267903 |

**e-Table 1B. IPF6 genelist**

| gene       | log2FC_vsotterIPF | p_vsotterIPF | log2FC_vsCTRL | p_vsCTRL    |
|------------|-------------------|--------------|---------------|-------------|
| TNNI3K     | 3.309055          | 2.19E-42     | 2.195866      | 0.003706558 |
| LINC01634  | 3.754876          | 3.46E-33     | 3.074595      | 0.001915418 |
| FAM74A1    | 4.827657          | 5.1E-33      | 4.746859      | 3.78105E-09 |
| AC137056.2 | 5.261797          | 4.29E-32     | 4.807171      | 2.74329E-05 |
| DMP1       | 4.459153          | 1.43E-31     | 4.084708      | 3.63591E-08 |
| AF067845.2 | 4.488181          | 2.99E-31     | 4.368217      | 1.14322E-06 |
| OR4C13     | 3.0583            | 5.71E-30     | 2.732278      | 9.97308E-08 |
| WNT8B      | 4.054472          | 7.43E-30     | 4.960717      | 2.49701E-06 |
| OR6C6      | 2.728572          | 1.18E-29     | 2.538955      | 2.26958E-06 |
| F9         | 4.305366          | 1.21E-29     | 4.541746      | 3.92386E-07 |
| COL5A3     | 4.807838          | 8.85E-29     | 9.040208      | 7.27185E-11 |
| CHRN4      | 5.287316          | 1.83E-28     | 5.002354      | 1.95214E-07 |
| SPEM2      | 4.538063          | 3.18E-28     | 4.61836       | 1.54759E-09 |
| GNG3       | 4.881592          | 3.48E-28     | 4.901991      | 8.27501E-08 |
| CDRT15     | 5.405081          | 5.61E-28     | 7.058584      | 0.002696734 |
| OR4M1      | 4.857521          | 6.52E-28     | 5.605997      | 0.001303892 |
| OR8B12     | 4.559598          | 8E-28        | 3.938363      | 7.51389E-05 |
| TEX19      | 3.839366          | 8.65E-28     | 3.40329       | 0.006060828 |
| OR13G1     | 4.388705          | 1.12E-27     | 5.716974      | 0.018544901 |
| SLC24A5    | 6.352506          | 1.22E-27     | 8.105198      | 0.000515041 |
| SHC3       | 3.207982          | 1.23E-27     | 5.052043      | 6.9509E-07  |
| TNP1       | 5.788802          | 1.23E-27     | 8.091707      | 8.38005E-07 |
| AC005176.1 | 3.715207          | 1.28E-27     | 3.641582      | 7.07622E-08 |
| AC073188.5 | 4.060352          | 1.28E-27     | 3.968535      | 1.21399E-06 |
| OR10A7     | 6.304946          | 1.28E-27     | 8.624804      | 0.001017198 |
| GLYATL2    | 4.349545          | 1.48E-27     | 4.44266       | 6.79206E-08 |
| PLA2G12B   | 5.78242           | 2.57E-27     | 5.432083      | 1.21749E-07 |
| AC022784.6 | 5.524807          | 3.09E-27     | 8.789274      | 2.22699E-08 |
| SORCS2     | 5.973615          | 3.09E-27     | 7.100803      | 0.007141834 |
| OR1L1      | 5.068113          | 3.12E-27     | 9.313846      | 2.03471E-10 |
| OR4S2      | 4.299681          | 3.12E-27     | 4.223462      | 1.81363E-07 |
| SPDYA      | 4.869751          | 3.22E-27     | 4.860935      | 8.70145E-06 |
| RNF180     | 5.850338          | 3.96E-27     | 9.510875      | 1.0241E-07  |
| BSND       | 4.437584          | 4.15E-27     | 4.318167      | 2.54683E-06 |
| ITIH3      | 5.291263          | 5.32E-27     | 5.483896      | 2.26294E-09 |
| ADD2       | 6.239581          | 5.52E-27     | 9.833211      | 8.84769E-10 |
| Z92544.1   | 5.876524          | 5.96E-27     | 5.632307      | 1.39392E-07 |
| PDHA2      | 3.482258          | 6.94E-27     | 2.058576      | 0.121277391 |

# CHEST<sup>®</sup> Online Supplement

|            |          |          |          |             |
|------------|----------|----------|----------|-------------|
| KAAG1      | 3.62643  | 9.85E-27 | 5.867586 | 4.34255E-06 |
| SLC12A3    | 4.698208 | 1.2E-26  | 3.994373 | 3.17766E-07 |
| UST-AS1    | 3.797722 | 1.37E-26 | 5.113837 | 3.83859E-08 |
| TRIM17     | 4.056187 | 1.47E-26 | 3.707387 | 4.24407E-07 |
| FAM74A3    | 5.39815  | 1.54E-26 | 5.417668 | 5.25999E-09 |
| CDH4       | 5.861094 | 1.76E-26 | 9.016127 | 0.000466854 |
| FGF17      | 5.009488 | 2.12E-26 | 5.217181 | 1.1213E-09  |
| OR52H1     | 2.414848 | 2.2E-26  | 2.579206 | 1.01333E-06 |
| OR2A12     | 5.844014 | 2.57E-26 | 7.932956 | 4.33987E-05 |
| INSC       | 5.246164 | 2.81E-26 | 7.275634 | 0.000836331 |
| AC237221.2 | 4.733487 | 2.95E-26 | 5.177493 | 1.03227E-07 |
| AMPD1      | 2.309743 | 4.38E-26 | 2.223143 | 1.71573E-07 |
| LRRTM4     | 4.083497 | 4.38E-26 | 4.120739 | 2.02917E-09 |
| SYT13      | 3.438089 | 4.45E-26 | 3.292234 | 1.87649E-06 |
| PAPPA2     | 3.684027 | 5.91E-26 | 5.766621 | 0.000373886 |
| DEFA11P    | 3.959025 | 7.89E-26 | 3.942363 | 5.48575E-06 |
| KCNF1      | 4.526455 | 7.99E-26 | 4.478541 | 7.80102E-08 |
| OR6S1      | 2.938434 | 7.99E-26 | 2.81382  | 1.21391E-05 |
| MYH11      | 4.178099 | 8.07E-26 | 3.744223 | 0.000189598 |
| TNN        | 6.447167 | 9.28E-26 | 8.854371 | 2.31625E-05 |
| FMR1NB     | 4.812407 | 9.73E-26 | 5.115415 | 4.18753E-10 |
| FAM71B     | 4.736256 | 1.1E-25  | 5.445687 | 0.000190291 |
| ROS1       | 4.526442 | 1.17E-25 | 5.916418 | 3.08575E-05 |
| AC062028.1 | 4.375694 | 1.24E-25 | 6.547016 | 2.94493E-05 |
| LMOD3      | 3.701746 | 1.24E-25 | 3.485207 | 2.40606E-05 |
| DDX4       | 3.435194 | 1.32E-25 | 6.519369 | 4.31861E-07 |
| XAGE3      | 3.803881 | 1.32E-25 | 5.934458 | 1.94376E-07 |
| C7ORF33    | 4.765964 | 1.54E-25 | 6.075515 | 0.061624568 |
| AC010226.1 | -2.43681 | 1.59E-25 | -4.28102 | 1.12011E-06 |
| GPM6A      | 2.737724 | 2E-25    | 2.975892 | 9.09634E-10 |
| IL17B      | 4.402268 | 2.28E-25 | 5.027393 | 8.98195E-09 |
| SOHLH1     | 5.123774 | 2.37E-25 | 6.658026 | 0.025594616 |
| MFSD2B     | 5.772413 | 2.76E-25 | 5.373034 | 2.31836E-08 |
| PCDHA13    | 3.444135 | 2.87E-25 | 3.080044 | 7.25253E-07 |
| RBBP8NL    | 5.778809 | 3.69E-25 | 5.68895  | 8.27501E-08 |
| PLA2G2F    | 5.493944 | 3.74E-25 | 8.170427 | 6.77737E-07 |
| TMPPE      | -2.31247 | 3.81E-25 | -1.75944 | 3.73423E-05 |
| OR2T4      | 3.980561 | 4.61E-25 | 3.671491 | 0.000308314 |
| PNMA3      | 6.051716 | 4.68E-25 | 9.369736 | 4.50017E-07 |
| ASB4       | 3.770733 | 4.72E-25 | 3.827434 | 4.13738E-08 |



# CHEST<sup>®</sup> Online Supplement

|            |          |          |          |             |
|------------|----------|----------|----------|-------------|
| PCDHA4     | 3.346388 | 5.44E-25 | 3.231354 | 3.88335E-08 |
| ZCCHC12    | 4.024665 | 5.44E-25 | 4.2204   | 1.39557E-07 |
| NID2       | 4.293139 | 5.66E-25 | 5.656029 | 0.003131091 |
| TRIM40     | 5.150941 | 6.9E-25  | 4.991614 | 1.9787E-06  |
| VWA5B2     | 4.767579 | 7.17E-25 | 5.01344  | 1.56812E-08 |
| LINC00598  | 5.720817 | 7.98E-25 | 5.123054 | 1.22513E-07 |
| CECR9      | 4.067329 | 8.16E-25 | 4.283028 | 2.20187E-07 |
| CFAP99     | 3.496617 | 8.48E-25 | 3.399487 | 5.13524E-07 |
| AC009501.1 | 3.950481 | 8.49E-25 | 4.237028 | 9.48333E-08 |
| AC016924.1 | 5.035188 | 8.69E-25 | 9.20706  | 3.95388E-06 |
| RNF227     | 5.469096 | 1.09E-24 | 5.793135 | 1.59176E-09 |
| NRXN3      | 5.442192 | 1.12E-24 | 6.701633 | 0.001191169 |
| TCF20      | 2.502178 | 1.12E-24 | 2.165074 | 2.82629E-08 |
| LRRC4C     | 2.487945 | 1.27E-24 | 2.192854 | 0.001770909 |
| OR4F6      | 2.881677 | 1.29E-24 | 2.821721 | 1.12187E-05 |
| IL24       | 4.952453 | 1.29E-24 | 4.856997 | 3.63591E-08 |
| MRGPRD     | 4.105758 | 1.34E-24 | 3.764158 | 0.00064491  |
| KIF7       | 3.525428 | 1.35E-24 | 3.053125 | 2.7455E-06  |
| KIF12      | 3.078851 | 1.48E-24 | 3.090366 | 4.82811E-06 |
| MPPED2     | 5.2553   | 1.48E-24 | 5.302845 | 2.24813E-09 |
| PDE3A      | 4.849614 | 1.66E-24 | 4.252027 | 7.80102E-08 |
| CCNI2      | 4.970013 | 1.7E-24  | 3.504592 | 0.000316953 |
| LSMEM2     | 5.658531 | 1.7E-24  | 8.832489 | 3.63591E-08 |
| PDIA2      | 3.668504 | 1.92E-24 | 3.867773 | 6.81519E-07 |
| AC093330.2 | 4.984044 | 2E-24    | 4.925356 | 4.60799E-10 |
| MYO3B      | 3.381348 | 2E-24    | 3.179141 | 0.000310612 |
| CEMP1      | 4.230197 | 2.26E-24 | 6.222864 | 0.000138961 |
| CDKN2B     | 6.505937 | 2.37E-24 | 10.01968 | 1.2858E-08  |
| EMID1      | 5.539719 | 2.37E-24 | 5.469249 | 1.55415E-09 |
| SCAMP5     | 4.894847 | 2.48E-24 | 4.482607 | 1.78973E-07 |
| SELENOV    | 4.927184 | 2.52E-24 | 4.984796 | 1.40251E-08 |
| NBPF7      | 3.371469 | 2.62E-24 | 2.933216 | 5.30923E-05 |
| XAGE2      | 6.091904 | 2.65E-24 | 9.986269 | 2.43629E-08 |
| SPATA41    | 4.447894 | 3.21E-24 | 4.270349 | 7.28386E-07 |
| BTNL9      | 4.827578 | 3.25E-24 | 4.773237 | 2.80667E-08 |
| SDK1       | 6.210112 | 3.3E-24  | 8.55027  | 1.31747E-06 |
| C3ORF85    | 5.390242 | 4.04E-24 | 4.727385 | 3.62171E-06 |
| CYP39A1    | 4.797039 | 4.32E-24 | 4.787355 | 1.62346E-08 |
| RALYL      | 5.733529 | 4.32E-24 | 5.627322 | 2.21477E-08 |
| ANO7       | 5.677098 | 4.69E-24 | 4.867715 | 4.41523E-08 |



|            |          |          |          |             |
|------------|----------|----------|----------|-------------|
| CD300LG    | 3.611178 | 4.73E-24 | 3.544759 | 1.61067E-06 |
| DCDC1      | 5.479908 | 4.84E-24 | 5.149707 | 1.07739E-06 |
| FTCD       | 5.353665 | 4.84E-24 | 4.589487 | 2.4201E-05  |
| ITGB1BP2   | 4.732988 | 5.6E-24  | 4.378545 | 1.9476E-11  |
| BX537318.2 | 2.668566 | 5.78E-24 | 2.671209 | 1.62346E-08 |
| Z97634.1   | 5.239999 | 6.7E-24  | 4.843306 | 1.71825E-06 |
| TBX4       | 3.56813  | 7.95E-24 | 7.02212  | 2.00289E-08 |
| SPATA31E1  | 4.328491 | 8.57E-24 | 4.490691 | 9.26753E-08 |
| MATN4      | 2.256815 | 8.77E-24 | 2.156963 | 4.46337E-05 |
| OR10W1     | 5.541798 | 8.77E-24 | 5.633432 | 2.84872E-08 |
| USP2       | 4.618551 | 8.94E-24 | 4.249781 | 2.18402E-06 |
| HILS1      | 5.586975 | 1.01E-23 | 8.856831 | 1.60965E-07 |
| LINC02171  | 3.325378 | 1.01E-23 | 6.345878 | 1.86585E-05 |
| CSRNP3     | 5.085483 | 1.17E-23 | 4.977619 | 2.48141E-07 |
| EXOC1      | 3.04842  | 1.26E-23 | 2.916171 | 7.4155E-08  |
| HYALP1     | 5.168413 | 1.28E-23 | 4.972202 | 3.20558E-08 |
| TNFRSF13B  | 4.04319  | 1.62E-23 | 5.641434 | 0.029210664 |
| LINC00971  | 2.612994 | 1.8E-23  | 2.337352 | 0.000300891 |
| OR56A5     | 6.062824 | 1.92E-23 | 9.735398 | 5.02118E-05 |
| GCM2       | 6.866974 | 2.14E-23 | 8.442274 | 2.57341E-05 |
| STS        | 4.614776 | 2.19E-23 | 3.118139 | 5.51407E-06 |
| C2CD4B     | 5.2521   | 2.23E-23 | 4.943203 | 7.64772E-06 |
| SELE       | 4.940159 | 2.27E-23 | 4.494022 | 2.69519E-07 |
| GCNT4      | 4.622623 | 2.29E-23 | 8.598885 | 4.86504E-11 |
| ZBTB48     | 2.738684 | 2.29E-23 | 1.999039 | 3.69568E-05 |
| OR52E6     | 3.721695 | 2.62E-23 | 3.629616 | 8.50011E-06 |
| HTR5A      | 4.242651 | 2.68E-23 | 4.216792 | 7.80102E-08 |
| ALX1       | 6.465034 | 3.35E-23 | 9.938722 | 2.73062E-08 |
| FGA        | 4.634556 | 3.56E-23 | 4.897747 | 9.21193E-08 |
| MAP1B      | 5.271283 | 3.58E-23 | 6.656844 | 0.006741001 |
| ZNF48      | 3.559277 | 4.41E-23 | 3.519169 | 4.63652E-06 |
| MYL10      | 3.532575 | 4.96E-23 | 3.489844 | 3.10853E-08 |
| OR6K6      | 3.966043 | 5.17E-23 | 4.317793 | 0.069249611 |
| CALML6     | 4.585944 | 5.22E-23 | 4.640962 | 2.20187E-07 |
| SLFNL1     | 3.523275 | 6.29E-23 | 3.128889 | 4.17695E-06 |
| TOE1       | 3.021713 | 6.29E-23 | 2.477542 | 3.53637E-06 |
| BBOX1      | 4.529758 | 6.35E-23 | 4.494148 | 8.36593E-08 |
| NUTM1      | 4.382363 | 6.53E-23 | 7.46146  | 1.26887E-08 |
| C19ORF71   | 5.516087 | 7.44E-23 | 5.368758 | 3.22716E-07 |
| LAMB4      | 3.625147 | 7.44E-23 | 3.29287  | 1.85629E-06 |



# CHEST<sup>®</sup> Online Supplement

|            |          |          |          |             |
|------------|----------|----------|----------|-------------|
| RLN3       | 4.097714 | 7.44E-23 | 4.357897 | 3.77653E-08 |
| CCDC189    | -2.32311 | 7.81E-23 | -2.74874 | 2.72383E-06 |
| C22ORF23   | 4.81736  | 8.83E-23 | 4.744797 | 2.00104E-07 |
| OR4C6      | 5.55388  | 9.56E-23 | 8.267545 | 0.000114318 |
| MAGEB4     | 4.52977  | 1.04E-22 | 4.618874 | 9.49093E-08 |
| OR5J2      | 5.75724  | 1.06E-22 | 9.202586 | 4.29266E-07 |
| SLC5A5     | 3.988342 | 1.11E-22 | 3.459674 | 2.00104E-07 |
| NTSR2      | 3.787244 | 1.11E-22 | 3.665672 | 1.68955E-05 |
| LCN8       | 3.333459 | 1.16E-22 | 3.238319 | 0.000382788 |
| TNR        | 4.306581 | 1.16E-22 | 4.6607   | 8.98195E-09 |
| KLHL22     | 3.64878  | 1.26E-22 | 3.223207 | 6.02741E-06 |
| SCG2       | 4.96154  | 1.29E-22 | 5.348755 | 4.03935E-07 |
| LACTB2-AS1 | 3.481737 | 1.35E-22 | 3.595701 | 9.27726E-08 |
| LINC01743  | 4.252543 | 1.57E-22 | 6.539719 | 9.09033E-08 |
| LCE3E      | 4.729466 | 1.65E-22 | 4.65783  | 1.81363E-07 |
| BARHL2     | 6.596443 | 1.68E-22 | 7.761448 | 0.011452592 |
| LDB2       | 5.247172 | 1.74E-22 | 4.606907 | 3.74861E-07 |
| ANKRD33B   | 5.112393 | 1.8E-22  | 7.605416 | 0.000180149 |
| DRD4       | 3.165614 | 1.83E-22 | 2.38418  | 0.000106685 |
| HGC6.3     | 2.586275 | 1.83E-22 | 2.262589 | 2.23131E-05 |
| CLTC       | 5.625877 | 1.88E-22 | 5.65389  | 2.03471E-10 |
| RNF113B    | 4.780895 | 1.94E-22 | 4.372588 | 1.11536E-07 |
| LINC01973  | 6.192406 | 2.08E-22 | 6.551863 | 1.19935E-09 |
| CNGB3      | 4.264815 | 2.24E-22 | 4.297444 | 1.67359E-08 |
| KLK15      | 3.174821 | 2.44E-22 | 2.750889 | 0.000169574 |
| C1QL1      | 4.267697 | 2.44E-22 | 6.401944 | 2.45074E-05 |
| PDE6C      | 5.582122 | 2.46E-22 | 5.642657 | 3.21667E-08 |
| SLCO1A2    | 3.235197 | 2.49E-22 | 7.085889 | 7.05598E-05 |
| HIGD1B     | 3.219004 | 2.54E-22 | 3.307576 | 2.66005E-07 |
| SV2B       | 4.742142 | 2.54E-22 | 4.957732 | 0.022041797 |
| MBP        | 2.298723 | 2.59E-22 | 2.223262 | 6.26472E-09 |
| CRYBB3     | 3.749109 | 2.63E-22 | 4.033579 | 2.24813E-09 |
| SPACA5     | 5.115985 | 2.64E-22 | 5.016354 | 1.47757E-08 |
| HOXD10     | 3.010447 | 2.7E-22  | 3.092165 | 7.51366E-09 |
| OR2D3      | 4.501495 | 2.7E-22  | 6.975869 | 7.65402E-05 |
| COL4A1     | 4.382664 | 2.74E-22 | 4.290525 | 2.50044E-07 |
| SLC6A13    | 4.704843 | 2.97E-22 | 6.827042 | 0.001637769 |
| ODAM       | 5.317124 | 3.07E-22 | 6.842158 | 2.00916E-05 |
| MSH4       | 3.42858  | 3.09E-22 | 3.512265 | 1.41988E-07 |
| MPPED1     | 5.639335 | 3.26E-22 | 8.179837 | 5.7957E-07  |



# CHEST<sup>®</sup> Online Supplement

|            |          |          |          |             |
|------------|----------|----------|----------|-------------|
| FZD9       | 4.34636  | 3.38E-22 | 4.620432 | 9.0357E-07  |
| MMP11      | 4.142391 | 3.38E-22 | 4.307944 | 6.26472E-09 |
| AC020658.3 | 3.59907  | 3.72E-22 | 3.541569 | 6.70464E-07 |
| OR1F1      | 4.65432  | 3.72E-22 | 8.568967 | 1.68784E-08 |
| SYT12      | 4.589036 | 3.79E-22 | 6.957909 | 1.93226E-06 |
| KLK12      | 4.395881 | 3.87E-22 | 4.399147 | 1.07635E-05 |
| SPON1      | 2.867066 | 3.87E-22 | 2.600879 | 0.000189598 |
| SPDYE10P   | 5.652196 | 4.66E-22 | 4.832247 | 8.96769E-05 |
| CATIP      | 4.120839 | 4.71E-22 | 3.73857  | 9.4689E-07  |
| NGFR       | 4.253235 | 4.98E-22 | 4.240549 | 2.15139E-06 |
| KBTBD12    | 2.588397 | 5.38E-22 | 2.714808 | 2.46542E-06 |
| ARID3C     | 4.685453 | 5.4E-22  | 4.224641 | 5.74034E-06 |
| PRPF40B    | 4.88326  | 5.52E-22 | 3.839745 | 8.02752E-06 |
| SYNJ2      | 4.0003   | 6.56E-22 | 4.397552 | 3.77232E-08 |
| KLK13      | 2.751315 | 6.59E-22 | 4.604931 | 0.000171854 |
| NACAD      | 4.454435 | 6.72E-22 | 4.75357  | 1.30046E-08 |
| GIF        | 2.236739 | 6.73E-22 | 2.355965 | 0.000192554 |
| FAM196B    | 5.095278 | 6.74E-22 | 4.763916 | 3.44774E-05 |
| PRKG1      | 4.075267 | 6.74E-22 | 3.774128 | 8.91407E-07 |
| TEX44      | 4.148377 | 7.13E-22 | 4.196909 | 7.33057E-07 |
| STEAP2     | 4.690012 | 7.4E-22  | 6.039026 | 2.03471E-10 |
| MXRA8      | 5.626762 | 8.94E-22 | 7.893579 | 0.000371049 |
| FAM19A4    | 2.513692 | 9.26E-22 | 2.146218 | 0.01567814  |
| SF3B2      | 3.195258 | 9.43E-22 | 4.81532  | 3.71534E-05 |
| TMEM262    | 5.432639 | 1E-21    | 8.078686 | 1.34027E-06 |
| FAM182B    | 3.735411 | 1.01E-21 | 7.632326 | 9.32362E-09 |
| DHX9       | 2.447842 | 1.1E-21  | 1.995016 | 0.000164843 |
| GABRG3     | 2.670492 | 1.17E-21 | 2.645917 | 9.17721E-09 |
| KLK14      | 3.733415 | 1.17E-21 | 3.446244 | 0.000220804 |
| TNNT2      | 5.635796 | 1.17E-21 | 7.799948 | 0.000189715 |
| LCE3A      | 4.202039 | 1.23E-21 | 4.176049 | 3.8712E-06  |
| CRB2       | 4.047783 | 1.25E-21 | 7.836363 | 6.25747E-08 |
| TCTE3      | 4.563037 | 1.3E-21  | 4.991095 | 0.028521412 |
| C1QL2      | 4.466361 | 1.32E-21 | 7.702334 | 1.22247E-06 |
| AL592486.1 | 4.06271  | 1.37E-21 | 5.742533 | 0.00017781  |
| OR7E13P    | -2.68141 | 1.37E-21 | -2.43161 | 2.60656E-07 |
| PHLDB3     | 3.988574 | 1.37E-21 | 3.398733 | 3.5085E-06  |
| CCDC42     | 4.448991 | 1.39E-21 | 4.212491 | 2.60656E-07 |
| OR52E4     | 4.914892 | 1.5E-21  | 4.086896 | 7.64772E-06 |
| OR6X1      | 4.186322 | 1.5E-21  | 3.885308 | 1.04842E-06 |

# CHEST<sup>®</sup> Online Supplement

|           |          |          |          |             |
|-----------|----------|----------|----------|-------------|
| NOP53-AS1 | 3.944027 | 1.5E-21  | 3.637742 | 7.667E-05   |
| OR2AK2    | 3.223659 | 1.76E-21 | 7.639967 | 1.90589E-06 |
| CCDC62    | 4.055868 | 1.8E-21  | 3.863257 | 3.17536E-08 |
| MUC22     | 5.016502 | 1.94E-21 | 4.785027 | 2.79467E-06 |
| CCDC185   | 2.85958  | 1.94E-21 | 2.83405  | 3.44752E-05 |
| OR2A5     | 4.903388 | 1.95E-21 | 4.236738 | 1.63457E-07 |
| TUBAL3    | 4.194628 | 2.04E-21 | 5.980369 | 0.002139024 |
| TBX2      | 4.842344 | 2.32E-21 | 7.671264 | 1.05514E-07 |
| GRXCR2    | 3.539469 | 2.33E-21 | 5.109928 | 0.001748903 |
| WNT9A     | 2.754719 | 2.39E-21 | 3.00964  | 3.49668E-06 |
| BEND7     | 5.144959 | 2.4E-21  | 5.454834 | 8.86968E-09 |
| OR1J2     | 3.880935 | 2.46E-21 | 3.742323 | 2.77776E-05 |



**e-Table 2. Gos**

| GO                                                                                | p_value_ove<br>rall | log2FC_IPF1vsC<br>TRL | log2FC_IPF2vsC<br>TRL | log2FC_IPF3vsC<br>TRL | log2FC_IPF4vsC<br>TRL | log2FC_IPF5vsC<br>TRL | log2FC_IPF6vsC<br>TRL |
|-----------------------------------------------------------------------------------|---------------------|-----------------------|-----------------------|-----------------------|-----------------------|-----------------------|-----------------------|
| hsa04740 Olfactory transduction                                                   | 3.6373E-33          | 3.27444985            | 1.03131523            | 0.53076294            | 2.57065175            | -0.5546165            | 5.91201833            |
| GO:0050906 detection of stimulus involved in sensory perception                   | 3.6373E-33          | 2.96044574            | 0.81574636            | 0.27616392            | 2.35476237            | -0.7450311            | 5.79748593            |
| GO:0050907 detection of chemical stimulus involved in sensory perception          | 1.0955E-32          | 2.97887009            | 0.81435841            | 0.27961358            | 2.34698241            | -0.7891476            | 5.71279375            |
| GO:0050911 detection of chemical stimulus involved in sensory perception of smell | 1.1509E-32          | 3.19742124            | 0.94819348            | 0.4691796             | 2.52652828            | -0.5921539            | 5.98315788            |
| GO:0004984 olfactory receptor activity                                            | 1.1509E-32          | 3.19742124            | 0.94819348            | 0.4691796             | 2.52652828            | -0.5921539            | 5.98315788            |
| GO:1903426 regulation of reactive oxygen species biosynthetic process             | 2.4131E-32          | -0.8749586            | -0.0552645            | 0.3057823             | -0.103618             | 1.33197653            | -0.5197552            |
| GO:0007608 sensory perception of smell                                            | 3.102E-32           | 3.03447033            | 0.90991143            | 0.46742203            | 2.34712924            | -0.6541062            | 5.75359332            |
| GO:0009593 detection of chemical stimulus                                         | 9.0355E-32          | 2.90813132            | 0.78691981            | 0.28435711            | 2.28419234            | -0.6230597            | 5.68666314            |
| GO:0007606 sensory perception of chemical stimulus                                | 3.8371E-31          | 2.81329944            | 0.80190226            | 0.27896977            | 2.18966697            | -0.8274441            | 5.3709968             |
| GO:1903409 reactive oxygen species biosynthetic process                           | 1.6149E-29          | -0.7927143            | 0.01267347            | 0.36582987            | -0.0140985            | 1.42888621            | -0.4643572            |
| GO:0071260 cellular response to mechanical stimulus                               | 1.3046E-28          | -0.5991068            | 0.32893573            | 0.52242427            | -0.0087694            | 1.04919553            | -1.0986789            |
| GO:2000377 regulation of reactive oxygen species metabolic process                | 8.1731E-28          | -0.5746727            | 0.24170686            | 0.69689372            | 0.24232963            | 1.61920092            | -0.2029549            |
| GO:0044088 regulation of vacuole organization                                     | 1.459E-26           | -0.5337487            | -0.0205525            | -0.0417547            | -0.5547235            | 0.26592276            | -1.4020176            |
| GO:0051092 positive regulation of NF-kappaB transcription factor activity         | 2.4308E-26          | -1.5137303            | -0.6836103            | -0.2348634            | -1.0594069            | 0.6354895             | -1.2822126            |
| GO:0036473 cell death in response to oxidative stress                             | 3.2655E-26          | -0.7046779            | 0.26945457            | 0.58935641            | -0.1249699            | 1.25384239            | -0.798477             |
| GO:1903201 regulation of oxidative stress-induced cell death                      | 4.452E-26           | -0.7076158            | 0.18695554            | 0.49351362            | -0.2477608            | 1.13569248            | -0.7571581            |
| GO:0042058 regulation of epidermal growth factor receptor signaling pathway       | 1.5056E-25          | -1.1846222            | -0.4773659            | -0.2659388            | -0.445264             | 0.2199432             | -1.4231495            |
| GO:0022408 negative regulation of cell-cell adhesion                              | 1.5932E-25          | -1.4468312            | -0.9396959            | -0.2979539            | -0.5293467            | 0.73144153            | 0.0534864             |
| GO:1902882 regulation of response to oxidative stress                             | 6.9077E-25          | -0.449169             | 0.30407676            | 0.6895123             | -0.0400073            | 1.35587164            | -0.5071365            |



# CHEST<sup>®</sup> Online Supplement

|                                                                             |            |            |            |            |            |            |            |
|-----------------------------------------------------------------------------|------------|------------|------------|------------|------------|------------|------------|
| GO:0005549 odorant binding                                                  | 7.4435E-25 | 1.49120986 | 0.40962891 | 0.37683587 | 1.35592408 | -0.0561853 | 3.1613402  |
| GO:0045446 endothelial cell differentiation                                 | 1.2059E-24 | -0.6223433 | 0.20756243 | 0.40920927 | 0.1244281  | 1.34348733 | -0.4973147 |
| GO:1901184 regulation of ERBB signaling pathway                             | 1.4582E-24 | -1.0736772 | -0.3826056 | -0.1598822 | -0.2907696 | 0.38875867 | -1.2164143 |
| GO:0007173 epidermal growth factor receptor signaling pathway               | 1.4952E-24 | -1.2918887 | -0.565112  | -0.2137964 | -0.2526961 | 0.49120955 | -1.1909331 |
| GO:0003158 endothelium development                                          | 1.9649E-24 | -0.5131796 | 0.29270765 | 0.57212127 | 0.277348   | 1.39339773 | -0.3525455 |
| GO:0042542 response to hydrogen peroxide                                    | 4.2818E-24 | -0.6082812 | 0.16556316 | 0.33951187 | 0.25745555 | 1.12795654 | -1.0002007 |
| GO:0035092 sperm chromatin condensation                                     | 1.051E-23  | 1.1629541  | 0.14765052 | 0.1028935  | 0.78991588 | -0.0988515 | 1.73042535 |
| GO:0001933 negative regulation of protein phosphorylation                   | 1.0595E-23 | -0.4598052 | 0.18083533 | 0.64018592 | 0.51220986 | 1.44476806 | -0.7026908 |
| GO:0003407 neural retina development                                        | 1.2405E-23 | 1.05492234 | -0.0580793 | 0.00237802 | 0.87086129 | -0.1458348 | 1.59178867 |
| GO:0031647 regulation of protein stability                                  | 1.5848E-23 | -1.1981366 | -0.1527519 | -0.0894087 | -0.6086797 | 0.3704941  | -1.7507685 |
| GO:0031996 thioesterase binding                                             | 2.0146E-23 | -1.0388266 | -0.3451841 | -0.2101741 | -0.438669  | 0.4099327  | -0.6586629 |
| GO:0009141 nucleoside triphosphate metabolic process                        | 2.0904E-23 | -0.026543  | 0.97521714 | 0.61320191 | -0.0076228 | 0.46070954 | -1.4940127 |
| GO:0030016 myofibril                                                        | 2.4639E-23 | 0.62802898 | -0.093602  | -0.0226488 | 0.55868681 | 0.04160497 | 1.99190505 |
| GO:0005261 cation channel activity                                          | 3.0104E-23 | 1.33150113 | 0.43844379 | 0.23614224 | 1.08729843 | -0.1590996 | 2.38360869 |
| GO:1900407 regulation of cellular response to oxidative stress              | 3.0939E-23 | -0.5015906 | 0.27892871 | 0.65618087 | -0.0221099 | 1.3474228  | -0.5273246 |
| GO:0022839 ion gated channel activity                                       | 4.802E-23  | 1.16813229 | 0.22097028 | 0.04961128 | 0.87124958 | -0.4485365 | 2.42296375 |
| GO:2000379 positive regulation of reactive oxygen species metabolic process | 7.988E-23  | -0.5714367 | 0.0746464  | 0.44161409 | 0.1389514  | 1.36108861 | -0.0932007 |
| GO:0009144 purine nucleoside triphosphate metabolic process                 | 8.3964E-23 | 0.04961772 | 0.9461697  | 0.56576091 | 0.00799179 | 0.35451317 | -1.4397408 |
| GO:0032637 interleukin-8 production                                         | 9.2263E-23 | -0.5618486 | 0.2292727  | 0.36945505 | -0.4262013 | 1.09002288 | -0.4078369 |
| GO:0060042 retina morphogenesis in camera-type eye                          | 1.121E-22  | 0.96601705 | -0.0834025 | -0.0007016 | 0.81617494 | 0.00054742 | 1.53748769 |
| GO:0099699 integral component of synaptic membrane                          | 1.2365E-22 | 1.45876194 | 0.4464781  | 0.27923224 | 1.14372058 | -0.0552766 | 2.59702201 |
| GO:0030017 sarcomere                                                        | 2.2862E-22 | 0.90557587 | 0.06273404 | 0.04556402 | 0.78514745 | 0.06644863 | 2.11275748 |
| GO:0035579 specific granule membrane                                        | 3.1536E-22 | -0.7063578 | 0.17390252 | 0.63509316 | 0.09037238 | 1.38600789 | -1.356905  |
| GO:0009205 purine ribonucleoside triphosphate metabolic process             | 3.3594E-22 | 0.04266906 | 0.91103288 | 0.52643416 | -0.0010534 | 0.30286967 | -1.4156386 |
| GO:0042326 negative regulation of phosphorylation                           | 3.8588E-22 | -0.4196734 | 0.23050026 | 0.65853854 | 0.50666863 | 1.40691866 | -0.7394691 |

*Online supplements are not copyedited prior to posting and the author(s) take full responsibility for the accuracy of all data.*



# CHEST® Online Supplement

|                                                                                      |            |            |            |            |            |            |            |
|--------------------------------------------------------------------------------------|------------|------------|------------|------------|------------|------------|------------|
| GO:0002444 myeloid leukocyte mediated immunity                                       | 4.0971E-22 | -1.1120592 | 0.39155767 | 0.83376209 | 0.15098695 | 2.15940507 | -2.5239496 |
| GO:0022836 gated channel activity                                                    | 4.0971E-22 | 1.08697384 | 0.16970808 | 0.03006473 | 0.85717286 | -0.4234791 | 2.37444377 |
| GO:0051272 positive regulation of cellular component movement                        | 4.4641E-22 | -0.7370745 | -0.0981887 | 0.54165394 | 0.4356933  | 1.92930818 | 0.20685845 |
| GO:0030335 positive regulation of cell migration                                     | 4.5417E-22 | -0.6728103 | -0.0409013 | 0.60545078 | 0.56106224 | 1.96879355 | 0.18685293 |
| GO:0043292 contractile fiber                                                         | 5.1295E-22 | 0.58307377 | -0.135431  | -0.0242969 | 0.50525125 | 0.06454289 | 2.00951563 |
| GO:0048194 Golgi vesicle budding                                                     | 6.4611E-22 | -0.6609296 | 0.0900514  | 0.06763283 | -0.5639253 | 0.03700387 | -1.8050349 |
| GO:0042059 negative regulation of epidermal growth factor receptor signaling pathway | 7.163E-22  | -1.0111624 | -0.1679311 | -0.1415418 | -0.4182376 | 0.28444465 | -1.4782244 |
| GO:0009199 ribonucleoside triphosphate metabolic process                             | 9.1261E-22 | 0.04376168 | 0.9375473  | 0.58329385 | 0.02431032 | 0.36114374 | -1.3967456 |
| GO:0072593 reactive oxygen species metabolic process                                 | 1.048E-21  | -0.3953914 | 0.38186408 | 0.75269813 | 0.52797227 | 1.96172566 | -0.0206836 |
| GO:0002446 neutrophil mediated immunity                                              | 1.0721E-21 | -1.0778746 | 0.3461683  | 0.81210564 | 0.09392905 | 2.10597449 | -2.5507299 |
| GO:0004935 adrenergic receptor activity                                              | 1.0721E-21 | 0.96993771 | -0.0194157 | 0.06073602 | 1.10392085 | 0.11017779 | 2.32183214 |
| GO:2000147 positive regulation of cell motility                                      | 1.1159E-21 | -0.6703032 | -0.0710469 | 0.57370042 | 0.52610626 | 1.95548126 | 0.22876595 |
| GO:0005865 striated muscle thin filament                                             | 1.1494E-21 | 0.3225155  | -0.5778394 | -0.5005958 | 0.02414047 | -0.7085667 | 2.04636152 |
| GO:0101003 ficolin-1-rich granule membrane                                           | 1.3454E-21 | -1.0743463 | -0.2858784 | -0.1331629 | -0.3505705 | 0.80247155 | -1.3579024 |
| GO:1901185 negative regulation of ERBB signaling pathway                             | 1.515E-21  | -0.8901875 | -0.1272713 | -0.0455217 | -0.2604072 | 0.4669159  | -1.1873442 |
| GO:0021903 rostrocaudal neural tube patterning                                       | 1.5414E-21 | 0.80650333 | 0.03666737 | -0.0550443 | 0.75239234 | -0.0544649 | 1.31754971 |
| GO:0005216 ion channel activity                                                      | 1.5556E-21 | 1.02972596 | 0.09889636 | 0.03479262 | 0.93196762 | -0.2843222 | 2.54186168 |
| GO:0034599 cellular response to oxidative stress                                     | 1.7531E-21 | -0.7303224 | 0.32578819 | 0.56749223 | -0.1100642 | 1.06630594 | -1.1762644 |
| GO:0044449 contractile fiber part                                                    | 1.8625E-21 | 0.81897351 | -0.0282876 | 0.00011141 | 0.70151384 | 0.06050974 | 2.11588522 |
| GO:0002726 positive regulation of T cell cytokine production                         | 2.064E-21  | -1.342569  | -0.536378  | -0.1752242 | -0.9498224 | 0.7128181  | -0.6215331 |
| GO:0055002 striated muscle cell development                                          | 2.5158E-21 | 0.83422158 | -0.1194343 | 0.07166295 | 0.70148684 | 0.20195719 | 1.97681064 |
| GO:0022838 substrate-specific channel activity                                       | 3.0385E-21 | 1.13804969 | 0.22084546 | 0.16908164 | 1.02644841 | -0.1946228 | 2.65488749 |
| GO:0008631 intrinsic apoptotic signaling pathway in response to oxidative stress     | 3.0875E-21 | -0.4088619 | 0.19941033 | 0.44021292 | 0.08854337 | 0.87880287 | -0.6421392 |
| GO:0030239 myofibril assembly                                                        | 3.2642E-21 | 0.6932056  | -0.1581597 | -0.0393904 | 0.58807204 | 0.04180328 | 2.05650839 |
| GO:0032482 Rab protein signal transduction                                           | 3.2851E-21 | -1.240762  | -0.4991299 | -0.3897282 | -0.7093475 | 0.17481615 | -1.7600133 |

*Online supplements are not copyedited prior to posting and the author(s) take full responsibility for the accuracy of all data.*



# CHEST® Online Supplement

|                                                                  |            |            |            |            |            |            |            |
|------------------------------------------------------------------|------------|------------|------------|------------|------------|------------|------------|
| GO:0002275 myeloid cell activation involved in immune response   | 3.4787E-21 | -1.113057  | 0.30432182 | 0.76369356 | 0.10020666 | 2.0460939  | -2.4885474 |
| GO:0040017 positive regulation of locomotion                     | 3.4977E-21 | -0.7030173 | -0.0463725 | 0.55049359 | 0.41457146 | 1.88887163 | 0.15050321 |
| GO:0015267 channel activity                                      | 3.6728E-21 | 1.17437273 | 0.23528167 | 0.22851498 | 1.06590504 | -0.106882  | 2.7770274  |
| GO:0022803 passive transmembrane transporter activity            | 3.7786E-21 | 1.17967946 | 0.2363128  | 0.22551315 | 1.07841163 | -0.1068222 | 2.76860298 |
| GO:0042119 neutrophil activation                                 | 4.0905E-21 | -1.0407116 | 0.32754365 | 0.81121026 | 0.16564674 | 2.16610987 | -2.4395564 |
| GO:0036379 myofilament                                           | 4.4475E-21 | 0.25515772 | -0.58412   | -0.5097099 | -0.0254663 | -0.7006984 | 1.89070527 |
| GO:1903579 negative regulation of ATP metabolic process          | 4.5015E-21 | -0.1746559 | 0.46530609 | 0.63909738 | 0.08865767 | 0.79911042 | -0.832735  |
| GO:0035116 embryonic hindlimb morphogenesis                      | 4.5015E-21 | 1.115378   | 0.129905   | 0.04173063 | 0.88221139 | -0.1701152 | 1.31467208 |
| GO:0042481 regulation of odontogenesis                           | 4.5788E-21 | 0.77751416 | -0.0657273 | 0.056731   | 1.0690056  | 0.02301951 | 1.5852261  |
| GO:0009167 purine ribonucleoside monophosphate metabolic process | 4.7935E-21 | 0.12821905 | 1.06208152 | 0.66126268 | 0.04276545 | 0.39648949 | -1.2041135 |
| GO:0009636 response to toxic substance                           | 6.1705E-21 | -0.0776345 | 0.50943128 | 0.89773029 | 0.92732828 | 1.92982915 | 0.37932346 |
| GO:0043312 neutrophil degranulation                              | 6.206E-21  | -1.030629  | 0.32804743 | 0.76492248 | 0.11412218 | 2.06362564 | -2.5946223 |
| GO:0035136 forelimb morphogenesis                                | 7.1007E-21 | 1.69929418 | 0.59068006 | 0.36547016 | 1.32579009 | 0.0906962  | 1.72475089 |
| GO:0046677 response to antibiotic                                | 7.1007E-21 | -0.4076884 | 0.18399708 | 0.51433652 | 0.42342689 | 1.23175603 | -0.1396374 |
| GO:0035137 hindlimb morphogenesis                                | 7.555E-21  | 1.27760583 | 0.25220115 | 0.11721382 | 0.89246512 | -0.1304321 | 1.44705614 |
| GO:0036230 granulocyte activation                                | 7.555E-21  | -1.0694854 | 0.27988384 | 0.77652687 | 0.11073307 | 2.13442226 | -2.4555673 |
| GO:0002283 neutrophil activation involved in immune response     | 7.555E-21  | -1.0433373 | 0.31983247 | 0.77119532 | 0.10538637 | 2.0509745  | -2.5333137 |
| GO:0072657 protein localization to membrane                      | 8.8597E-21 | -1.335161  | -0.2702954 | -0.1838789 | -0.4566604 | 0.50961393 | -1.4092852 |
| GO:0034614 cellular response to reactive oxygen species          | 8.9041E-21 | -0.3677036 | 0.34972231 | 0.55368411 | 0.22145318 | 1.12218407 | -0.7732064 |
| GO:0046034 ATP metabolic process                                 | 9.4255E-21 | 0.16432116 | 1.06145422 | 0.70539445 | 0.10840541 | 0.43862409 | -1.1862954 |
| GO:0055001 muscle cell development                               | 1.1165E-20 | 0.89820121 | -0.0788384 | 0.14026888 | 0.76685604 | 0.29336209 | 2.02719604 |
| GO:0032757 positive regulation of interleukin-8 production       | 1.1165E-20 | -0.5371044 | 0.26372629 | 0.3158774  | -0.3113481 | 0.90652832 | -0.5568197 |
| GO:0035115 embryonic forelimb morphogenesis                      | 1.1526E-20 | 1.52759614 | 0.46980953 | 0.26486503 | 1.2167647  | -0.0516112 | 1.59883316 |
| GO:0043299 leukocyte degranulation                               | 1.2456E-20 | -0.9879777 | 0.41727336 | 0.83391472 | 0.22236893 | 2.13448614 | -2.4645389 |
| GO:0031400 negative regulation of protein modification process   | 1.2549E-20 | -0.4058432 | 0.33620341 | 0.59880988 | 0.46959475 | 1.15737709 | -1.3082248 |

Online supplements are not copyedited prior to posting and the author(s) take full responsibility for the accuracy of all data.



# CHEST<sup>®</sup> Online Supplement

|                                                                                           |            |            |            |            |            |            |            |
|-------------------------------------------------------------------------------------------|------------|------------|------------|------------|------------|------------|------------|
| GO:0101002 ficolin-1-rich granule                                                         | 1.2577E-20 | -0.7530963 | 0.35577427 | 0.47364554 | 0.06825903 | 1.25669995 | -1.7748873 |
| GO:0009161 ribonucleoside monophosphate metabolic process                                 | 1.4772E-20 | 0.11521969 | 1.11014415 | 0.73086617 | 0.04179027 | 0.46242539 | -1.2459299 |
| GO:0019866 organelle inner membrane                                                       | 1.504E-20  | 0.18369871 | 1.72746782 | 1.03580767 | 0.31030739 | 0.82698651 | -2.0004551 |
| GO:0051098 regulation of binding                                                          | 1.8304E-20 | -1.2040534 | -0.4098141 | -0.1394137 | -0.3451685 | 0.38390695 | -1.1807067 |
| GO:0006979 response to oxidative stress                                                   | 1.9545E-20 | -0.604749  | 0.33716521 | 0.55415732 | 0.13487313 | 1.25372251 | -1.0078413 |
| GO:2000058 regulation of ubiquitin-dependent protein catabolic process                    | 2.0697E-20 | -0.8621327 | -0.0857728 | -0.1187996 | -0.671758  | 0.04996576 | -1.7933368 |
| GO:0002367 cytokine production involved in immune response                                | 2.1717E-20 | -1.0250887 | -0.0196942 | 0.3034632  | -0.202174  | 1.46578365 | -0.5264424 |
| GO:0006643 membrane lipid metabolic process                                               | 2.5301E-20 | -0.2085571 | 0.53329921 | 0.5891687  | 0.05291189 | 0.63124462 | -1.6335108 |
| GO:0010256 endomembrane system organization                                               | 2.6694E-20 | -1.3760029 | -0.3124172 | -0.2528149 | -0.8482126 | 0.23064799 | -2.3939033 |
| GO:0070820 tertiary granule                                                               | 2.6765E-20 | -0.3749431 | 0.50183884 | 0.73726691 | 0.30640885 | 1.63638997 | -1.4733244 |
| GO:0002043 blood vessel endothelial cell proliferation involved in sprouting angiogenesis | 3.4009E-20 | 0.59214858 | -0.0731181 | 0.08320241 | 1.07424286 | 0.6491677  | 1.89264884 |
| GO:0099240 intrinsic component of synaptic membrane                                       | 3.8491E-20 | 1.35296542 | 0.42113222 | 0.27617386 | 1.07073249 | -0.0868154 | 2.43739345 |
| GO:0032507 maintenance of protein location in cell                                        | 4.4537E-20 | -0.6352787 | 0.05123232 | 0.00706157 | -0.4157828 | 0.14378787 | -1.4782827 |
| GO:1902175 regulation of oxidative stress-induced intrinsic apoptotic signaling pathway   | 4.7997E-20 | -0.3543143 | 0.13256448 | 0.3547281  | -0.0119239 | 0.72011762 | -0.55916   |
| GO:0009126 purine nucleoside monophosphate metabolic process                              | 4.946E-20  | 0.1527245  | 1.05993771 | 0.65459911 | 0.05681006 | 0.40001512 | -1.1371191 |
| GO:0071216 cellular response to biotic stimulus                                           | 5.61E-20   | -0.9253439 | -0.0380547 | 0.45347292 | -0.0432362 | 1.41970035 | -0.4486518 |
| GO:0032677 regulation of interleukin-8 production                                         | 5.9251E-20 | -0.4264552 | 0.30090412 | 0.3372122  | -0.3917891 | 0.95629984 | -0.50575   |
| GO:1901338 catecholamine binding                                                          | 5.9251E-20 | 0.77522919 | -0.0761125 | 0.00692187 | 0.77486593 | 0.01487294 | 2.05076893 |
| GO:0098936 intrinsic component of postsynaptic membrane                                   | 5.977E-20  | 1.22469355 | 0.30756221 | 0.23458345 | 0.96085059 | -0.0581958 | 2.42891381 |
| GO:0070821 tertiary granule membrane                                                      | 8.5968E-20 | -0.5232824 | 0.21884053 | 0.53066455 | 0.09200231 | 1.34187517 | -1.0824757 |
| GO:0090114 COPII-coated vesicle budding                                                   | 8.7834E-20 | -0.6005302 | 0.07672278 | 0.0704787  | -0.5287344 | 0.08293848 | -1.6111628 |
| GO:0016925 protein sumoylation                                                            | 9.5646E-20 | -0.3819551 | 0.02484099 | -0.1498361 | -0.3851698 | -0.1096903 | -1.4730554 |
| GO:0099055 integral component of postsynaptic membrane                                    | 9.7176E-20 | 1.21874085 | 0.29281989 | 0.22319159 | 0.94313465 | -0.0533156 | 2.41534901 |

*Online supplements are not copyedited prior to posting and the author(s) take full responsibility for the accuracy of all data.*



|                                                                                 |            |            |            |            |            |            |            |
|---------------------------------------------------------------------------------|------------|------------|------------|------------|------------|------------|------------|
| GO:0007338 single fertilization                                                 | 1.2852E-19 | 1.33859881 | 0.45802043 | 0.38047702 | 0.88973406 | -0.0171537 | 1.50821597 |
| GO:0060491 regulation of cell projection assembly                               | 1.4514E-19 | -1.113879  | -0.3249336 | -0.0774243 | -0.218848  | 0.38118264 | -1.380183  |
| GO:0018205 peptidyl-lysine modification                                         | 1.6135E-19 | -1.1874084 | -0.0922233 | -0.2523318 | -0.9781695 | -0.1612907 | -2.2988705 |
| GO:2000060 positive regulation of ubiquitin-dependent protein catabolic process | 1.6281E-19 | -0.8044513 | -0.1847758 | -0.0796628 | -0.566514  | 0.16679122 | -1.3551559 |
| GO:0022843 voltage-gated cation channel activity                                | 1.6667E-19 | 1.51669259 | 0.60399766 | 0.33853615 | 1.07723202 | -0.1269236 | 1.85120282 |
| GO:0120032 regulation of plasma membrane bounded cell projection assembly       | 1.9757E-19 | -1.0958567 | -0.3133489 | -0.0612724 | -0.1914672 | 0.39590598 | -1.3666919 |
| GO:0043161 proteasome-mediated ubiquitin-dependent protein catabolic process    | 2.1826E-19 | -1.0429576 | 0.14753335 | 0.06105712 | -0.7911516 | 0.39608734 | -2.4088245 |
| GO:0050821 protein stabilization                                                | 2.2213E-19 | -1.1522494 | -0.2588618 | -0.3369702 | -0.7780947 | 0.11434988 | -1.7671694 |
| GO:0042581 specific granule                                                     | 2.2213E-19 | -0.788634  | 0.09920565 | 0.62950216 | 0.08318902 | 1.72234295 | -1.5051651 |
| GO:0072606 interleukin-8 secretion                                              | 2.984E-19  | -0.3662309 | 0.20918899 | 0.53891235 | 0.27410455 | 1.3773989  | 0.20101587 |
| GO:0017112 Rab guanyl-nucleotide exchange factor activity                       | 3.1758E-19 | -0.4880255 | 0.01880894 | 0.02109532 | -0.524245  | -0.0481789 | -1.6663707 |
| GO:0030049 muscle filament sliding                                              | 3.5174E-19 | 0.23653122 | -0.4993708 | -0.5608933 | 0.10368201 | -0.5236338 | 1.62662018 |
| GO:0033275 actin-myosin filament sliding                                        | 3.5174E-19 | 0.23653122 | -0.4993708 | -0.5608933 | 0.10368201 | -0.5236338 | 1.62662018 |
| GO:0010563 negative regulation of phosphorus metabolic process                  | 3.721E-19  | -0.4540733 | 0.18857663 | 0.60495593 | 0.45152596 | 1.31342498 | -0.7438789 |
| GO:0045936 negative regulation of phosphate metabolic process                   | 3.8349E-19 | -0.4496924 | 0.18966768 | 0.6084251  | 0.45262186 | 1.31729428 | -0.7352245 |
| GO:0002698 negative regulation of immune effector process                       | 3.8512E-19 | -1.3734216 | -0.6556732 | -0.3228936 | -0.8673419 | 0.34328247 | -1.2484212 |
| GO:0006998 nuclear envelope organization                                        | 4.138E-19  | -0.0959044 | 0.60989677 | 0.58377175 | -0.0684456 | 0.58736216 | -1.1402662 |
| GO:2000117 negative regulation of cysteine-type endopeptidase activity          | 4.1412E-19 | -0.3082876 | 0.36066339 | 0.56013262 | 0.48512554 | 1.42873568 | -0.4315658 |
| GO:1901222 regulation of NIK/NF-kappaB signaling                                | 4.1412E-19 | -1.1022255 | -0.5466895 | -0.0553914 | -0.6387667 | 0.73142802 | -0.7418822 |
| hsa04120 Ubiquitin mediated proteolysis                                         | 5.1062E-19 | -1.3942969 | -0.2530119 | -0.1901625 | -0.9253124 | 0.04334139 | -2.4382601 |
| GO:0001818 negative regulation of cytokine production                           | 5.6607E-19 | -1.4855358 | -0.3883073 | -0.0716085 | -0.5669094 | 0.97799872 | -1.4056434 |
| GO:0043393 regulation of protein binding                                        | 5.9563E-19 | -1.1308446 | -0.5633478 | -0.0681672 | -0.2629901 | 0.33326686 | -0.7894242 |
| GO:0022407 regulation of cell-cell adhesion                                     | 5.9563E-19 | -2.216449  | -1.4680914 | -0.7065496 | -1.0300326 | 0.96272559 | -0.2889747 |

Online supplements are not copyedited prior to posting and the author(s) take full responsibility for the accuracy of all data.

# CHEST<sup>®</sup> Online Supplement

|                                                                   |            |            |            |            |            |            |            |
|-------------------------------------------------------------------|------------|------------|------------|------------|------------|------------|------------|
| GO:0006903 vesicle targeting                                      | 6.4311E-19 | -0.5912051 | 0.072761   | 0.01733269 | -0.5572471 | 0.08297174 | -1.7595064 |
| GO:0005743 mitochondrial inner membrane                           | 6.4311E-19 | 0.33323023 | 1.8588876  | 1.13869181 | 0.34797523 | 0.77292801 | -1.9625983 |
| GO:1903362 regulation of cellular protein catabolic process       | 6.5487E-19 | -0.8594031 | -0.0574513 | 0.03905992 | -0.616529  | 0.23226304 | -2.0305728 |
| GO:0071219 cellular response to molecule of bacterial origin      | 6.8936E-19 | -0.8746555 | -0.072836  | 0.43319057 | 0.04392286 | 1.49563431 | -0.2819505 |
| GO:0016050 vesicle organization                                   | 6.9744E-19 | -1.3943303 | -0.4293502 | -0.4041337 | -1.0916535 | -0.0282857 | -2.3862837 |
| GO:0042487 regulation of odontogenesis of dentin-containing tooth | 7.0605E-19 | 0.44932897 | -0.2140912 | -0.069144  | 0.76547524 | 0.13756736 | 1.46362009 |
| GO:0071625 vocalization behavior                                  | 7.2658E-19 | 0.49154397 | -0.3361878 | -0.054491  | 0.80040476 | 0.12470437 | 1.4936639  |
| GO:0033674 positive regulation of kinase activity                 | 7.2888E-19 | -0.6396866 | -0.1047251 | 0.33207581 | -0.0364573 | 1.39055425 | -0.1511876 |
| GO:0019058 viral life cycle                                       | 7.7549E-19 | -1.079988  | -0.3464561 | -0.0424177 | -0.6151502 | 0.57291679 | -2.0436552 |
| GO:0071222 cellular response to lipopolysaccharide                | 9.1831E-19 | -0.9637683 | -0.1379568 | 0.32673757 | 0.01360569 | 1.39754534 | -0.3018441 |

213330
